1 Comparing the Performance of mScarlet-I, mRuby3, and mCherry as FRET Acceptors  
2 for mNeonGreen

3

4 Tyler W. McCulloch<sup>1</sup>, David M. MacLean<sup>1</sup>, and Paul J. Kammermeier<sup>1\*</sup>

5

6

7

8

9 <sup>1</sup>Department of Pharmacology and Physiology, University of Rochester Medical Center,  
10 Rochester, New York, United States of America.

11

12

13

14

15 \* Corresponding author

16

17 Email: paul\_kammermeier@urmc.rochester.edu (PJK)

## 18 **Abstract**

19 Förster Resonance Energy Transfer (FRET) has become an immensely powerful tool to  
20 profile intra- and inter-molecular interactions. Through fusion of genetically encoded  
21 fluorescent proteins (FPs) researchers have been able to detect protein oligomerization,  
22 receptor activation, and protein translocation among other biophysical phenomena.  
23 Recently, two bright monomeric red fluorescent proteins, mRuby3 and mScarlet-I, have  
24 been developed. These proteins offer much improved physical properties compared to  
25 previous generations of monomeric red FPs that should help facilitate more general  
26 adoption of Green/Red FRET. Here we assess the ability of these two proteins, along  
27 with mCherry, to act as a FRET acceptor for the bright, monomeric, green-yellow FP  
28 mNeonGreen using intensimetric FRET and 2-photon Fluorescent Lifetime Imaging  
29 Microscopy (FLIM) FRET techniques. We first determined that mNeonGreen was a  
30 stable donor for 2-photon FLIM experiments under a variety of imaging conditions. We  
31 then tested the red FP's ability to act as FRET acceptors using mNeonGreen-Red FP  
32 tandem construct. With these constructs we found that mScarlet-I and mCherry are able  
33 to efficiently FRET with mNeonGreen in spectroscopic and FLIM FRET. In contrast,  
34 mNeonGreen and mRuby3 FRET with a much lower efficiency than predicted in these  
35 same assays. We explore possible explanations for this poor performance but are  
36 unable to definitively determine the cause, all though protein maturation seems to play a  
37 role. Overall, we find that mNeonGreen is an excellent FRET donor, and both mCherry  
38 and mScarlet-I, but not mRuby3, act as practical FRET acceptors, with mScarlet-I out  
39 performing mCherry due it's higher brightness.

40

## 41 **Introduction**

42 Genetically encoded Fluorescent Proteins (FPs) have advanced basic and translational  
43 biology immensely. Starting with the cloning of the *Aequorea victoria* green FP[1], a  
44 massive and continual effort to expand the number of available FPs with a different  
45 physical and spectral properties began. Currently, there is an enormous variety of FPs  
46 at all parts of the visible spectrum, and even some parts of the ultraviolet and infrared  
47 spectrums. These new proteins were either cloned from other organisms[2-4], or  
48 developed through evolution of already identified FPs[4-11]. This ever expanding  
49 catalog of FPs has been reviewed by others[12-14], and new efforts and archives have  
50 been created to organize this information, such as the FPbase database[15].

51 As the catalogue of FPs has expanded, so have the potential uses. Of particular  
52 note is the use of FPs as biosensors which can measure signaling events, cell  
53 metabolites, pH, voltage and more[16]. Many of these biosensors employ Förster  
54 Resonance Energy Transfer (FRET) as part of their reporting mechanism, producing a  
55 change in acceptor emission upon donor excitation when the quantity of interest  
56 changes. FRET is also orientation and distance dependent[17], meaning that the  
57 magnitude of energy transfer (described as the FRET efficiency) can be used to study  
58 either the steady state or dynamic changes in protein interactions. Much of the work  
59 utilizing FPs for FRET has been done using Cyan/Yellow FP pairs due to their  
60 brightness, but these proteins suffer from large overlaps in their emission spectra  
61 making interpretation of results unnecessarily challenging, among other complicating  
62 factors. Green/Red FP pairs offer greater separation of their emission spectra while  
63 maintaining the high degree of spectral overlap between donor emission and acceptor  
64 absorption that allows for efficient energy transfer. Green/Red FPs also offer greater  
65 Förster radii than most Cyan/Yellow protein pairs, enabling FRET over longer distances.  
66 Being able to detect FRET over larger distances often leads to greater dynamic range

67 and sensitivity. Additionally, cellular toxicity to blue light has been well documented in a  
68 variety of systems[18-22], emphasizing the need for better green and red shifted FRET  
69 pairs. Historically, Green/Red FRET has been limited by unfavorable fluorescent  
70 properties of the red protein[23-26], but several recently developed monomeric red  
71 fluorescent proteins are reported to have improved absorption, brightness, and stability  
72 indicating they may act as high quality FRET acceptors for green FPs.

73 It is the aim of this study to characterize these recently released red FPs as  
74 FRET acceptors in hopes of helping aid a more general adoption of Green/Red FRET.  
75 Here, we investigate the ability of next generation red FPs, mRuby3 and mScarlet-I as  
76 well as mCherry to act as a FRET acceptor for the green-yellow FP donor  
77 mNeonGreen. mRuby3[10] is the newest iteration of the Ruby series of red FPs[8, 9]  
78 originally developed from eqFP611[3]. The mScarlet series of red FPs[11] was  
79 developed from a synthetic gene template based off several naturally occurring red FPs.  
80 Three monomeric red FPs were evolved from this strategy, the bright variant mScarlet,  
81 the fast maturing variant mScarlet-I, and the fast lifetime variant mScarlet-H. For this  
82 study, we use mScarlet-I due to its fast maturation time, as slower maturation is less  
83 ideal for fusion proteins studies. mCherry[6], a commonly used monomeric red FP  
84 developed from DsRed[2], is included in this study to act as a standard. For the donor  
85 molecule, we chose mNeonGreen[4], an incredibly bright and stable green-yellow FP  
86 derived from the monomerization of the tetrameric yellow fluorescent protein LanYFP[4].

87

## 88 **Materials and Methods**

### 89 **Cell culture and transfection**

90 HEK293A cells (ATCC; Manassas, VA) were maintained in Dulbecco's Modified Eagle  
91 Medium (DMEM) supplemented with 1X GlutaMAX™, 100 units/mL penicillium, 100  
92 µg/mL streptomycin (ThermoFisher Scientific; Waltham, MA), and 10% heat-inactivated  
93 fetal bovine serum (Atlas Biologicals; Fort Collins, CO). To induce expression of  
94 fluorescent proteins, cells were transiently transfected using polyethylenimine (PEI)  
95 transfection. For all transfections the indicated amounts of DNA and PEI were mixed  
96 together in DMEM containing no supplements for 30 minutes before addition to cells at  
97 the indicated time point. For FLIM experiments, cells were plated on number 1 cover  
98 slips (Warner Instruments; Hamden, CT) in 12-well plates (Nest Scientific USA;  
99 Rahway, NJ) 48 hours prior to experiments. Cells were then transfected 24 before  
100 experiments began using 0.6 µg of cDNA for the indicated construct and 1.6 µg of PEI  
101 in 1 mL of media. For confocal experiments, cells were plated in 35 mm plastic culture  
102 dishes (Corning; Corning, NY) 48-72 hours prior to experiments, followed by  
103 transfection with 1 µg of cDNA using 2.4 µg of PEI in 2 mL of media 24-36 hours before  
104 imaging began. For spectral FRET and immunoblotting experiments, cells were plated  
105 in 10 cm plastic culture dishes and allowed to grow to 70% confluency. Cells were then  
106 transfected with 4 µg of cDNA using 7.8 µg of PEI 24 hours before experiments started.

107

## 108 **Plasmids and cloning**

109 All constructs used in this manuscript are derived from the pKanCMV-mClover3-  
110 mRuby3 plasmid (Plasmid #74252) available on Addgene.org (Addgene; Watertown,  
111 MA). NG-Ruby3 was created by removing mClover3 and all but the last 5 amino acids  
112 of the linker from pKanCMV-mClover3-mRuby3 by inverse PCR, and the full  
113 mNeonGreen coding sequence was inserted in its place using In-Fusion cloning

114 (Takara Bio; Mountain View, CA). NG-Scarlet and NG-Cherry were created by deleting  
115 mRuby3 from NG-Ruby3 by inverse PCR and insertion of either mScarlet-I or mCherry  
116 using In-Fusion cloning (Takara Bio). NG-Stop was created using the same inverse  
117 PCR product as NG-Scarlet and NG-Cherry via blunt end ligation using NEBs KLD Mix  
118 (New England Biolabs; Ipswich, MA). The mNeonGreen gene was obtained from the  
119 pmNeonGreen-NT plasmid (Allele Biotechnology; San Diego, CA), the mScarlet-I gene  
120 was obtained from the Lck-mScarlet-I plasmid (Addgene, plasmid #98821), and the  
121 mCherry gene was obtained from the pmCherry-N1 plasmid (Takara Bio). Reaction  
122 products were transformed, screened, and amplified in XL10-Gold Ultracompetent *E.*  
123 *coli* cells (Agilent Technologies; Santa Clara, CA). Plasmid were isolated using an  
124 E.Z.N.A Plasmid MiniPrep Kit (Omega Bio-teck; Norcross, GA) or a ZymoPure II  
125 Plasmid Midiprep Kit (Zymo Research; Irvine, CA) per manufactures recommendations.  
126 All constructs were verified by sanger sequencing (Eurofins Genomics; Louisville, KY)  
127 and stored at a concentration of 1 µg/µL in a -20°C freezer. All plasmids and constructs  
128 generated for this manuscript are available upon request.

129

## 130 **Spectral FRET**

131 For spectral FRET experiments, cells were used 24-36 hours post transfection. A single  
132 10 cm dish of cells expressing the construct of interest were washed with imaging buffer  
133 (136 mM NaCl, 560 µM MgCl<sub>2</sub>, 4.7 mM KCl, 1 mM Na<sub>2</sub>HPO<sub>4</sub>, 1.2 mM CaCl<sub>2</sub>, 10 mM  
134 HEPES, 5.5 mM Glucose) several times and pelleted. Cell pellets were then  
135 resuspended in 500 µL of imaging buffer and transferred to disposable acrylate cuvettes  
136 (Spectrocell Inc; Orelan, PA). Emission scans were collected from 490-750 nm using a  
137 470 nm excitation wavelength using a Cary Eclipse Fluorescence Spectrophotometer

138 (Agilent Technologies). Cells were resuspended by vigorous pipetting immediately prior  
139 to scans. Data was collected in the Cary Eclipse Scan Application software package  
140 (Agilent Technologies) and exported to Microsoft Excel (Microsoft Corporation) for  
141 analysis. To estimate FRET efficiency from emission scans, linear unmixing was  
142 performed in Igor Pro (WaveMetrics Inc; Lake Oswego OR) using donor only and  
143 acceptor only emission scans to determine the contributions of donor and acceptor. Due  
144 to the high level of consistency between the NG-Stop and reported spectrum for purified  
145 mNeonGreen (S2 Fig), the purified mNeonGreen spectrum was used as the donor only  
146 scan for linear unmixing. For each of the acceptors, custom acceptor only scans were  
147 created based on experimentally collected data and their reported purified spectrum (as  
148 discussed in S2 Fig). All raw scans used for spectral FRET are available in S2 Fig.  
149 Once the contributing weight of donor and acceptor was determined, FRET efficiency  
150 was estimated using the following equation[27]:

151 
$$E = \frac{W_A}{\left(\frac{QY_A}{QY_D}\right)W_D + W_A} \times 100\% \quad (1)$$

152 where E is the FRET efficiency,  $W_A$  and  $W_D$  are the component weights of the donor  
153 only and acceptor only emissions calculated through linear unmixing, and  $QY_A$  and  $QY_D$   
154 is the quantum yield of the acceptor and donor respectively.

155

## 156 **Fluorescent lifetime imaging microscopy (FLIM)**

157 For FLIM experiments, cells were used 1-day post transfection unless otherwise noted.  
158 30 minutes before experiments begin, media was exchanged for imaging buffer and  
159 allowed to come to room temperature. Coverslips were transferred to a custom-built  
160 chamber and mounted onto the stage of an Olympus FluoView 1000-MP Multiphoton

161 and Scanning Confocal Microscope (Olympus; Tokyo, Japan). Excitation of samples  
162 was achieved using a Mai Tai Ti:Sapphire Femtosecond Pulse Laser (Spectra-Physics;  
163 Santa Clara, CA) tuned to 950 nm. Fluorescent decays were collected using a XLPlan N  
164 25x (NA 1.05) water immersion objective (Olympus) at 256x256 resolution and a pixel  
165 dwell time of 20  $\mu$ sec. The data was passed by the microscope to the FLIM set up,  
166 consisting of two H7422P Hamamatsu detectors (Hamamatsu; Hamamatsu City, Japan)  
167 and a time-correlated single photon counting card (Becker and Hickl; Berlin, Germany).  
168 To separate donor and acceptor emission, a BrightLine FF552-Bi02-25x36 dichroic  
169 (Semrock; Rochester, NY) was used. Emission light to the donor detector was further  
170 filtered with a BrightLine FF01-510/42-25 filter and emission to the acceptor detector  
171 was filtered with a BrightLine FF01-609/54-25 filter (Semrock). The microscope was  
172 controlled with the FV10-ASW software package (Olympus) and the FLIM system was  
173 controlled via the VistaVision by ISS software package (ISS Inc; Champaign, IL).  
174 Analysis of single cell lifetime decays was performed with VistaVision by ISS and  
175 subsequent lifetimes were analyzed in Microsoft Excel (Microsoft Corporation;  
176 Redmond, WA). Briefly, cells were isolated into individual regions of interest (ROIs), and  
177 the decay data for each pixel in the region above threshold were summed to create a  
178 cell fluorescence decay curve. These decay curves were then fit and lifetimes were  
179 extracted using non-linear regression in tail-fitting mode. Almost all decay curves were  
180 well described by a single exponential fit (as determined by Chi-squared analysis as  
181 well as by eye). Lifetimes were extracted from these fits and used to calculate FRET  
182 efficiency using the following equation[28]:

183

184

$$E = 1 - (\tau_{DA}/\tau_D) \quad (2)$$

185



186 Where E is the FRET efficiency,  $\tau_{DA}$  is the lifetime of the donor in the presence of  
187 acceptor, and  $\tau_D$  is the lifetime of the donor only species (in this case, the average  
188 lifetime of NG-Stop). For experiments where acceptor photobleaching was performed,  
189 cells were bleached by scanning with a 559 nm laser at 100% power for 15 minutes  
190 under the same parameters that the lifetime data was collected.

191

## 192 **Confocal microscopy**

193 For confocal microscopy experiments, cells were used 1-day post transfection. 30  
194 minutes before experiments began, media was exchanged for imaging buffer and  
195 allowed to come to room temperature. Images were then collected on the same  
196 microscope as the FLIM data utilizing a SIM scanner and 488 nm and 559 nm  
197 conventional laser lines. Widefield confocal images were collected through a  
198 XLUMPlanFI 20X (NA 0.95) water immersion objective (Olympus) at a resolution of  
199 2048x2048. The sample was excited, and emission collected in each channel  
200 individually to prevent bleed through. Green emission was collected through a 505-540  
201 nm filter and red emission was collected through a 575-675 nm filter. All imaging  
202 parameters were kept consistent across experiments to facilitate comparisons. Data  
203 was collected in FV10-ASW software package (Olympus) and exported to the Fiji  
204 software package[29] for analysis as described in the main text and S2 Fig using the  
205 Coloc2 plugin.

206

## 207 **Immunoblotting**

208 Samples for immunoblotting were harvested 24 hours after transfection. Cells were  
209 removed from their culture dish and washed twice with calcium and magnesium free

210 DPBS (Corning). Following cell lyses in the presence of protease inhibitors, protein  
211 concentrations were evaluated using a Pierce™ BCA Protein Assay Kit (ThermoFisher  
212 Scientific) and 10 µg of total protein was loaded into a 16% SDS-PAGE gel. After  
213 electrophoresis, proteins were transferred to a 0.2 µm nitrocellulose membrane  
214 (BioRad; Hercules, CA). Presence of the mNeonGreen protein was probed using a  
215 monoclonal mNeonGreen antibody [32F6] (Chromotek; Planegg-Martinsried, Germany)  
216 at a 1:1000 dilution and visualized using a DyLight 680 secondary antibody  
217 (ThermoFisher Scientific) at a 1:1000 dilution using an Odyssey 3 Imaging System (Li-  
218 cor Biosciences; Lincoln, NE).

219

## 220 **Statistics**

221 To avoid assumptions regarding the data distributions, all statistical significance in this  
222 manuscript was determined using a permutation test implemented through a custom  
223 Python script utilizing the MLxtend library[30] using the approximation method with  
224 1,000,000 permutations. For instances where there was less than 10 data points total  
225 between the two data sets being compared, an exact method was used.

226

## 227 **Results**

### 228 **Physical properties and spectrum of proteins in this study**

229 For this study, we utilized the monomeric, yellow-green fluorescent protein  
230 mNeonGreen to test the ability of two new red fluorescent proteins, mRuby3 and  
231 mScarlet-I, as well as mCherry to act as FRET acceptors. The fluorescent and physical  
232 properties of these proteins are listed in Table 1. mNeonGreen is one of the brightest  
233 fluorescent proteins to date with a high quantum yield and extinction coefficient making

234 it's signals easy to observe. In addition, mNeonGreen is also highly photostable[4],  
 235 making it an ideal FRET donor. Both mRuby3 and mScarlet-I have high extinction  
 236 coefficients, poising them to be excellent FRET acceptors. In comparison to mCherry,  
 237 these proteins also offer substantially higher quantum yield, indicating that it will be  
 238 easier to detect energy transfer events using the emission of one of these two proteins.  
 239 The absorbance and emission spectrum of mNeonGreen is overlaid with the spectrum  
 240 of mRuby3, mScarlet-I and mCherry in Fig 1A-C. For each red fluorescent protein, the  
 241 overlap integral ( $J(\lambda)$ ) and Förster radius ( $R_0$ ) values with mNeonGreen are listed in  
 242 Table 1. Based on these photophysical properties, all three red FPs are expected to  
 243 FRET with mNeonGreen. Assuming identical positioning between donor and acceptor,  
 244 mRuby3 is expected to produce the highest FRET efficiency and mCherry the lowest  
 245 FRET efficiency with mNeonGreen.

246

247 **Table 1. Properties of the fluorescent proteins used in this study**

| Protein          | Ref | $\lambda_{ex}$ max (nm) | $\lambda_{em}$ max (nm) | EC ( $M^{-1}cm^{-1}$ ) | QY   | pKa | Maturation (min) | $J(\lambda)$ ( $\times 10^{15} M^{-1}cm^{-1}nm^4$ ) | $R_0$ (Å) |
|------------------|-----|-------------------------|-------------------------|------------------------|------|-----|------------------|-----------------------------------------------------|-----------|
| <b>Donor</b>     |     |                         |                         |                        |      |     |                  |                                                     |           |
| mNeonGreen       | 4   | 506                     | 517                     | 116,000                | 0.8  | 5.7 | 10               | -                                                   | -         |
| <b>Acceptors</b> |     |                         |                         |                        |      |     |                  |                                                     |           |
| mRuby3           | 10  | 558                     | 592                     | 128,000                | 0.45 | 4.8 | 136.5            | 4.65                                                | 64        |
| mScarlet-I       | 11  | 569                     | 593                     | 104,000                | 0.54 | 5.4 | 36               | 3.60                                                | 61        |
| mCherry          | 6   | 587                     | 610                     | 72,000                 | 0.22 | 4.5 | 15               | 2.28                                                | 57        |

248  $\lambda_{ex}$  max = emission maximum,  $\lambda_{em}$  = emission maximum, EC = extinction coefficient, QY = quantum yield,  $J(\lambda)$  =  
 249 overlap integral,  $R_0$  = Förster Radius.  $J(\lambda)$  and  $R_0$  are calculated with mNeonGreen as the donor, an orientation factor  
 250 of 0.6667, and a refractive index of 1.33. Values were obtained from the references listed under the Ref column.

251

252 **Fig 1. Spectrum of mNeonGreen, mRuby3, mScarlet-I and mCherry.** Absorbance (dashed lines) and emission  
 253 spectrum (solid lines) of purified mNeonGreen (green lines) overlaid with the spectrum of purified mRuby3 (A),  
 254 mScarlet-I (B), and mCherry (C). Spectrum were obtained from the reference indicated in Table 1.

## 255 **mNeonGreen-RFP tandem constructs reveal poor**

## 256 **performance of mRuby3**

257 To test the ability of the red FPs to act as FRET acceptors, we constructed tandem FP  
258 constructs consisting of the full coding sequence of mNeonGreen followed by a short  
259 amino acid linker (SKGEE) and then the full coding sequence of the red FP (Fig 2A).  
260 Although a 5 amino acid linker is relatively short, inclusion of the full mNeonGreen c-  
261 terminus (which appears unstructured or absent in the mNeonGreen structure[31])  
262 creates an effective linker of 17 amino acids. A mNeonGreen-Stop construct was also  
263 created, which contains the full coding sequence of mNeonGreen, the 5 amino acid  
264 linker, and then a stop codon to act as a donor only control construct. To determine if  
265 mNeonGreen will FRET with the red FPs in these constructs, we transiently transfected  
266 each construct into HEK293 cells and measured the acceptor FP emission upon  
267 excitation with a wavelength that will only excite the donor. When cells expressing the  
268 NG-Stop constructs are excited with 470 nm light, a spectrum comparable to what has  
269 been reported for purified mNeonGreen was obtained (Fig 2B, S1 Fig in the  
270 Supplemental Information). When the NG-red FP tandem constructs are assayed, a  
271 second peak emerges corresponding to the red FP. Example spectrum for the NG-  
272 Ruby3, NG-Scarlet, and NG-Cherry constructs are shown in Fig 2C, 2D, and 2E  
273 respectively in pink, along with calculated donor (green) and acceptor components (red)  
274 determined through linear unmixing, as well as the fit (black dashed line) resulting from  
275 the addition calculated donor and acceptor components. Note that in all cases, the  
276 unmixing fit faithfully reproduced the raw data traces. Using the donor and acceptor  
277 components, the FRET efficiency of each construct can be estimated using Eq. 1 (Fig  
278 2F, with the raw traces available in S1 Fig). Over three independent transfections for

279 each construct, the NG-Scarlet and NG-Cherry construct presented a FRET efficiency  
280 of  $29 \pm 0.5\%$  and  $22 \pm 0.8\%$  respectively. Surprisingly, the NG-Ruby3 construct  
281 presented an estimated FRET efficiency of  $16 \pm 0.1\%$ . This poor performance in  
282 comparison to NG-Scarlet or NG-Cherry was highly unexpected considering the  
283 physical and spectral properties reported for mRuby3[10], which predicted it would be  
284 the best FRET acceptor of the three red FPs for mNeonGreen.

285

286 **Fig 2. Spectral FRET of each mNeonGreen-Red FP tandem constructs.** (A) Cartoon schematic of the  
287 mNeonGreen-Red FP tandem constructs used for FRET experiments. (B) Average emission scan of cells expressing  
288 NG-Stop (black) when excited at 470 nm overlaid with the reported spectrum for purified mNeonGreen in green ( $n = 3$   
289 independent transfections). Example raw emission spectrum (pink) of tandem (C) NG-Ruby3, (D) NG-Scarlet, and (E)  
290 NG-Cherry when excited at 470 nm. The dashed black line shows the sum of donor (green) and acceptor (red)  
291 components calculated by linear unmixing. (F) FRET efficiencies calculated from the spectrum for each construct  
292 ( $n=3$ ). \*\*\* =  $P < 0.0005$  between the indicated conditions.

## 293 **mNeonGreen is a suitable donor for two-photon FLIM**

294 To confirm our spectral FRET findings, we turned to the more precise method of 2-  
295 Photon Fluorescent Lifetime Imaging (FLIM). First sought to determine if mNeonGreen  
296 was a suitable donor for 2-Photon FLIM experiments. A well-behaved FRET donor  
297 would be easily excited by the 2-photon laser, be stable under a variety of 2-photon  
298 laser powers, and display a stable, mono-exponential lifetime[32]. To our knowledge,  
299 there is only one report of mNeonGreen's performance using two-photon  
300 illumination[33]. This study demonstrated that blue shifted fluorescent proteins tend to  
301 perform better under 2-photon excitation than more yellow shifted fluorescent proteins  
302 but did not preclude mNeonGreen's use from two-photon based studies. Using 950 nm  
303 light and the NG-Stop construct, we assayed mNeonGreen's performance in 2-photon  
304 FLIM over various conditions using Time Correlated Single Photon Counting. Over a

305 variety of laser powers, mNeonGreen produced a stable lifetime of  $3.05 \pm 0.01$  ns over  
306 50 frames of acquisition (Fig 3A). This lifetime was stable for up to 300 frames of  
307 acquisition for all but the highest laser power tested,  $25 \text{ W/cm}^2$  in which the lifetime  
308 linearly decayed to  $87 \pm 4.5\%$  of its initial value after 300 frames (Fig 3B). In contrast,  
309 significant photobleaching was observed for laser powers above  $15 \text{ W/cm}^2$  (Fig 3C) with  
310  $20 \text{ W/cm}^2$  and  $25 \text{ W/cm}^2$  bleaching approximately  $48 \pm 14\%$  and  $94 \pm 3\%$  of the sample  
311 intensity respectively after 300 frames. Example decay traces of a single cell collected  
312 in consecutive 50 frame intervals are shown at  $15 \text{ W/cm}^2$  (Fig 3D) and  $25 \text{ W/cm}^2$  (Fig  
313 3E). Normalizing the decay traces to the peak intensity for the  $25 \text{ W/cm}^2$  example  
314 demonstrates the reduction in lifetime and the decay in data quality over the course of  
315 acquisition at this power (Fig 2F). Given these data, we conclude that mNeonGreen is a  
316 suitable donor for two-photon FLIM experiments when the lifetime is acquired at a laser  
317 power of  $15 \text{ W/cm}^2$  or less. For all further FLIM experiments, data was collected at laser  
318 powers between  $5\text{-}10 \text{ W/cm}^2$  for 100-150 frames depending on the brightness of the  
319 cell.

320

321 **Fig 3. mNeonGreen performs well under various laser powers for two-photon time domain FLIM acquisitions.**

322 **(A)** Lifetime data collected from individual HEK293 cells expressing cytosolic mNeonGreen at various laser powers  
323 up to  $25 \text{ W/cm}^2$  after 50 frames. Black bars indicate the average  $\pm$  95% confidence interval. **(B)** Lifetime and **(C)**  
324 intensity of samples taken over 300 frames at various laser powers. \* =  $P < 0.05$ , \*\* =  $P < 0.005$ , and \*\*\* =  $P < 0.0005$   
325 compared to the frame matched  $5 \text{ W/cm}^2$  dataset. N for each sample is as follows  $5 \text{ W/cm}^2$ : 11 cells,  $10 \text{ W/cm}^2$ : 10  
326 cells,  $15 \text{ W/cm}^2$ : 14 cells,  $20 \text{ W/cm}^2$ : 9 cells,  $25 \text{ W/cm}^2$ : 11 cells. **(D)** Example lifetime decay curves obtained at  $15$   
327  $\text{ W/cm}^2$  over 300 frames. **(E)** Example lifetime decay and normalized decays **(F)** obtained at  $25 \text{ W/cm}^2$  over 300  
328 frames.

329 **FLIM-FRET measurements confirm poor performance of**

330 **mRuby3**

331 With FLIM, FRET is detected as a reduction of the donor's lifetime when in the presence  
332 of the acceptor[28]. This technique has the advantage of determining the FRET state  
333 between mNeonGreen and the red FP independent of the red FPs emission, allowing  
334 us to determine the FRET efficiency for each construct without having to account for the  
335 differences between each red FPs. Over the course of several independent  
336 transfections, the mNG-Stop construct produced a donor only lifetime of  $3.05 \pm 0.02$  ns  
337 (Fig 4A). When mScarlet-I or mCherry are present in the tandems, mNeonGreen's  
338 lifetime is reduced to  $2.22 \pm 0.06$  ns and  $2.23 \pm 0.03$  ns respectively (Fig 4A). This  
339 results in a FRET efficiency of the NG-Scarlet construct of  $27 \pm 2\%$  and an efficiency of  
340  $27 \pm 1\%$  for the NG-Cherry construct (Fig 4B). Assay of the NG-Ruby3 construct shows  
341 even worse performance of mRuby3 than what was estimated with spectral FRET (Fig  
342 2F). The average lifetime of the NG-Ruby3 construct was  $2.92 \pm 0.03$  ns (Fig 4A)  
343 resulting in a FRET efficiency of only  $4 \pm 0.9\%$  (Fig 4B). Indeed, 35 cells across 3  
344 independent transfections (over half of all cells sampled) exhibited lifetimes within the  
345 range of what was collected for the NG-Stop construct, whereas no cells expressing  
346 NG-Scarlet or NG-Cherry had lifetimes within that range (Fig 4A). Example decay traces  
347 representative of the average for each construct are shown in Fig 4C and example  
348 lifetime maps of HEK293 cells expressing each construct are shown in Fig 4D.

349

350 **Fig 4. Lifetime of mNeonGreen-Red FP tandem constructs.** (A) The lifetime of mNeonGreen in individual cells  
351 expressing a mNeonGreen-Red Protein tandem fusion construct. Black bars indicate the average  $\pm$  95% confidence  
352 interval. (B) FRET efficiency calculations for each tandem construct. \*\*\* =  $P < 0.005$  compared to NG-Stop and #  
353 indicates  $P < 0.0005$  compared to NG-Stop and  $P < 0.0005$  compared to NG-Ruby3. NG-Scarlet and NG-Cherry are  
354 not statistically different ( $P=0.75$ ) (C) Example decay curves for each tandem representative of the average lifetime of  
355 all cells for each construct. (D) Example lifetime heat maps for a single frame for each construct. N for each construct  
356 is as follows NG-Stop: 68 cells, NG-Ruby3: 63 cells, NG-Scarlet: 64 cells, and NG-Cherry: 64 cells.

357 ***Confocal imaging demonstrates lower than expected red***  
358 ***fluorescence for mNeonGreen-mRuby3 construct***

359 To further investigate the poor performance of mRuby3 as a FRET acceptor, we turned  
360 to confocal microscopy to analyze the behavior each tandem construct. The presence of  
361 mNeonGreen and the red FPs were independently surveyed via sequential excitation  
362 with a 488 nm and 559 nm lasers, with the emissions of each channel being collected  
363 separately to prevent bleed through. Example wide field images of cells expressing  
364 each construct are shown in Fig 5A. Qualitatively, it can be seen in the merged image of  
365 the green and red channels that the cells expressing the NG-Ruby3 construct had  
366 widely varying intensities of green and red fluorescence. Interestingly, cells were  
367 regularly observed that seem to contain high levels of mNeonGreen and low levels of  
368 mRuby3 or vice versa, alongside cells that appeared to contain both proteins. This  
369 heterogeneity was also noted in with the NG-Scarlet and NG-Cherry constructs, but with  
370 much less frequency (Fig 5A). This result was quite surprising given the constructs were  
371 designed to express mNeonGreen and the red FP stoichiometrically and in tandem.  
372 Theoretically, we would expect expression of such tandem constructs to result in a fixed  
373 ratio of green to red intensity where the red intensity varies depending on the brightness  
374 of the red FP and the extent of FRET. To test this prediction and quantify the  
375 heterogeneity for each construct we examined regions of interest (ROI) containing a  
376 single cell, extracted the green and red intensities for that cell following background  
377 subtraction, and plotted the resulting intensities at the pixel level. The resulting green-  
378 red intensity plots for each cell were then fit with a linear regression. An example of this  
379 workflow is diagramed in S2 Fig. While the absolute value of this slope will be different  
380 for each fluorophore pair and for different imaging conditions, the changes in this slope



381 from cell to cell under the same imaging conditions will report the heterogeneity of each  
382 construct. As expected of a tandem construct and based on qualitative assessments of  
383 images (Fig 5A), histograms of the slopes for individual cell expressing the NG-Cherry  
384 and NG-Scarlet constructs revealed a reasonable distribution and narrow spread of  
385 slopes (Fig 5C,D). This indicates the majority of cells expressing these constructs  
386 contain a fixed ratio of mNeonGreen to red FP. In contrast, the histogram of slopes from  
387 cells expressing NG-Ruby3 were not as evenly distributed (Fig 5B). Indeed, the majority  
388 of cells expressing this construct have a slope close to 0, suggesting that these cells  
389 contain measurable mNeonGreen levels but low levels of fluorescent mRuby3.  
390 Interestingly, this lack of abundant red fluorescence does not stem from a lack of  
391 mRuby3 protein as western blotting of cells transfected with NG-Ruby3 produce a  
392 similar banding pattern as those transfected with NG-Scarlet and NG-Cherry (S3 Fig).  
393 Importantly, in NG-Ruby3 transfected cells there is no smaller monomer sized band,  
394 indicating our tandem constructs are generally intact and ruling out the possibility of  
395 mNeonGreen produced without mRuby3. Taken together, these data provide a  
396 mechanistic explanation for our FLIM data in which all cells expressing the NG-Scarlet  
397 and NG-Cherry constructs exhibited robust FRET, whereas a large majority of NG-  
398 Ruby3 constructs did not. Further, they suggest that the poor performance of NG-Ruby3  
399 may be due to poor maturation of the acceptor compared to NG-Scarlet and even NG-  
400 Cherry.

401

402 **Fig 5. Confocal microscopy of the tandem constructs.** (A) Example images of NG-Red FP constructs when  
403 directly excited by 499 nm or 559 nm lasers. Histograms of the slopes of the red/green intensity correlations for  
404 individual cells expressing (B) NG-Ruby3 (n=1077 cells), (C) NG-Scarlet (n = 1745 cells), and (D) NG-Cherry (n=  
405 1557 cells).

## 406 **Expressing mNeonGreen-Ruby3 for longer periods of time** 407 **improves its performance**

408 To determine if the poor performance of mRuby3 as a FRET acceptor is due at least in  
409 part due to inefficient maturation, we performed FLIM experiments for up to five days  
410 following transient transfection with the NG-Ruby3 construct. As seen in Fig 6A, the  
411 average lifetime of mNeonGreen in the NG-Ruby3 construct decreases from  $2.92 \pm 0.03$   
412 ns 1-day post transfection (DPT) to  $2.41 \pm 0.09$  ns 5 DPT. This results in a change in  
413 average FRET efficiency of  $4 \pm 0.9\%$  1 DPT to an efficiency of  $21 \pm 3.0\%$  efficiency 5  
414 DPT transfection (Fig 6B). Example lifetime maps of individual cells expressing NG-  
415 Ruby3 2-5 DPT are shown in Fig 6C, with the example lifetime map for 1 DPT shown in  
416 Fig 3D. Example fluorescent decay traces for each DPT are available in S4 Fig. As time  
417 progressed, the number of cells exhibiting lifetimes within the range of the NG-Stop also  
418 decreased. However, even 5 DPT cells could still be observed that exhibited donor only  
419 like lifetimes. This indicates that although inefficient maturation in mammalian cells may  
420 be part of the reason mRuby3 performs poorly in previous experiments, it is likely not  
421 the only contributing factor. To ensure that the changes observed over time for the NG-  
422 Ruby3 construct were due to changes occurring to the mRuby3 protein, and not  
423 mNeonGreen, mNeonGreen lifetimes of the NG-Ruby3 constructs were determined  
424 before and after acceptor photobleaching on 5 DPT (Fig 6D). Regardless of the lifetime  
425 each cell exhibited before acceptor photobleaching, all cells exhibited lifetimes similar to  
426 that of the NG-Stop construct after acceptor photobleaching. Fig 6F shows example  
427 lifetime maps of two cells expressing NG-Ruby3 5 days post transfection before and  
428 after acceptor photobleaching and example fluorescent decay traces can be found in S4  
429 Fig. These findings demonstrate that the mNeonGreen lifetime remained stable over the

430 course of 5 days, indicating that the changes the NG-Ruby3 construct underwent was  
431 due to changes occurring to the mRuby3 protein.

432 **Fig 6. FRET of NG-Ruby3 1-5 days post transfection. (A)** Lifetimes of cells expressing NG-Ruby3 construct 1-5  
433 days post transfection (DPT) with 1 DPT is replicated from Fig 3A for reference. Black bars indicated the average  
434 lifetime  $\pm$  95% confidence interval. The green shading indicates the range of lifetimes observed from the NG-Stop  
435 construct. \*\*\* =  $P < 0.0005$  compared to 1 DPT, and # =  $P < 0.0005$  compared to 1 DPT and  $P < 0.0005$  compared to  
436 the day before. N for each condition is as follows, 2 DPT: 30 cells, 3 DPT: 34 cells, 4 DPT: 35 cells, and 5 DPT: 31  
437 cells. **(B)** Average FRET efficiency of NG-Ruby3 1-5 DPT. **(C)** Example lifetime maps collected each day tested. **(D)**  
438 Lifetime data from NG-Ruby3 expressing cells 5 days post transfection before and after acceptor photobleaching ( $n =$   
439 15). \*\*\* =  $P < 0.0005$  after photobleaching compared to before photobleaching. **(E)** Example lifetime maps of the  
440 same cells before and after acceptor photobleaching.

## 441 Discussion

442 Development and verification of bright monomeric Green/Red FP pairs will  
443 greatly increase the general adoption of Green/Red FRET. Bright fluorophores allow for  
444 easier detection and greater signal to noise ratio. Using green and red fluorophores  
445 specifically has several distinct advantages include reduced toxicity by the excitation  
446 source, greater spectral separation, larger Förster radii, and better tissue penetrance.  
447 These benefits allow for newer, more accurate and precise studies to be conducted with  
448 less confounding factors than what could be done with Cyan/Yellow FRET pairs.  
449 mNeonGreen is an ideal donor for Green/Red FRET experiments. Its yellow shifted  
450 excitation and emission spectrum allow for a high degree of overlap with red FPs while  
451 also being capable of being excited with lower energy blue light than cyan or more blue  
452 shifted green FPs. In addition, mNeonGreen is remarkably bright under single-photon  
453 illumination, making its signals easy to observe. Both mScarlet-I and mRuby3 are  
454 reported as having some of the highest extinction coefficients of any red FPs, as well as  
455 also being some of the brightest monomeric red FPs to date. These facts indicate that

456 they should make excellent FRET acceptors, making Green/Red FRET more accessible  
457 to researchers. In this study, we aimed to test this prediction using a variety of optical  
458 techniques.

459 We tested the ability of these two new red FPs – mRuby3 and mScarlet-I – along  
460 with mCherry to act as FRET acceptors for mNeonGreen using a tandem protein  
461 approach. Initially we used intensimetric spectral FRET to estimate the FRET  
462 efficiency between mNeonGreen and the red FPs (Fig 2). In this assay NG-Scarlet  
463 demonstrated the highest FRET efficiency, followed by NG-Cherry, and then NG-Ruby3  
464 (Fig 2F). This was surprising given the reported properties of mRuby3 predicted that it  
465 would be the best acceptor for mNeonGreen. Specifically, mRuby3 had the highest  
466 degree of overlap between its excitation spectrum and mNeonGreen's emission  
467 spectrum and it has the highest extinction coefficient of the three red FPs in this study.  
468 These experiments also demonstrated the advantages of these newer proteins over  
469 mCherry, as mScarlet-I produced almost 3 times the intensity of mCherry, despite only  
470 a 7% difference in estimated efficiency, and mRuby3 produced almost 1.5 times the  
471 intensity of mCherry, despite NG-Ruby3 exhibiting a lower FRET efficiency than NG-  
472 Cherry. This reflects the difference in extinction coefficient and quantum yield between  
473 these two proteins and mCherry and demonstrates how mScarlet-I is a better overall  
474 acceptor that will provide more signal and greater dynamic range for green-red based  
475 FRET experiments.

476 To confirm these results, we turned to a more precise technique, FLIM. FLIM has  
477 the advantages of only needing to observe only the donor, there for eliminating the need  
478 to correct our data for differences in the acceptors physical properties as reported by  
479 others. In addition, our FLIM set up allows for assaying single cells to allow for a more  
480 detailed profile of the tandem construct's behavior. After establishing mNeonGreen as a

481 suitable donor for 2-Photon FLIM experiments (Fig 3), we used this technique to  
482 measure the FRET efficiency of each tandem in the study (Fig 4). We found that both  
483 mScarlet-I and mCherry were able to efficiently FRET with mNeonGreen as almost to  
484 the same degree, but that mRuby3 was unable to induce substantial FRET (Fig 4A-B). It  
485 was somewhat surprising to see mCherry performed just as well as mScarlet-I as a  
486 FRET acceptor in our FLIM experiments, despite having a significantly lower extinction  
487 coefficient. This is likely due to the relatively short linker between mNeonGreen and the  
488 red FPs in this study, resulting in FPs placed in close proximity and biasing towards  
489 higher FRET efficiencies. In principle, as the distance between mNeonGreen and either  
490 mScarlet-I or mCherry increases, the FRET efficiency between the two will diverge such  
491 that the mCherry FRET efficiency will drop off compared with mScarlet-I. To further  
492 investigate mRuby3s poor performance, we employed confocal microscopy to reveal  
493 great heterogeneity in the way the NG-Ruby3 tandem expresses (Fig 5A-B), with many  
494 cells exhibiting either red or green fluorescence, without the other. This was in spite of  
495 western blotting analysis suggesting that most cells should be expressing the full-length  
496 tandem protein (S4 Fig).

497 In theory, the higher extinction coefficient and quantum yield of mRuby3 predicts  
498 that it should outperform the other red FPs tested herein. Shockingly though, we found  
499 the opposite result (Fig 2 and Fig 4). Even under the most ideal conditions tested (4 or 5  
500 days post transfection), the NG-Ruby3 tandem still did not reach the FRET efficiencies  
501 of the NG-Scarlet and NG-Cherry tandems (Fig 6). This is in contrast to a previous  
502 report of a similar mNeonGreen-mRuby3 construct performing very well, achieving  
503 nearly 40% efficiency in both HEK293 and Hela cells[10]. At this point, the reasons for  
504 this discrepancy is unclear, although similarities in linker length and composition,  
505 transfection times, and cell types suggest it is not due to a difference between the

506 makeup of the tandem constructs used or differences in the conditions in which the  
507 experiments were conducted (for what conditions were reported). In addition, we found  
508 during our experiments that the emission spectrum of mRuby3 in this tandem was  
509 slightly left shifted by 6 nm compared to what is reported purified mRuby3[10] (S1 Fig).  
510 This finding was not reported previously and although this shift was slight, it was  
511 necessary to correct for it in order to properly fit our data. The cause of this spectral shift  
512 remains unclear and may simply be a result of mRuby3 having slightly different behavior  
513 in cells versus in a purified system. This may also be due to the photochromic behavior  
514 previously reported for mRuby3[11]. Whatever the cause, unpredictable changes in  
515 spectrum are highly concerning for FRET experiments as they can result in changes in  
516 fluorescence intensity that may be misinterpreted as changes in FRET state. It is  
517 possible that that this behavior also influenced our spectral FRET experiments (Fig 2)  
518 and could account for the disparity between the calculated FRET efficiencies for the  
519 NG-Ruby3 construct in the spectral FRET vs. FLIM assays.

520         While few studies using mRuby3 have been published to date, studies utilizing its  
521 predecessor, mRuby2 report generally positive results[4, 9-11, 34, 35]. Although, a  
522 similar study to ours using the green FP mClover as a donor reported much lower than  
523 expected efficiencies when using mRuby2 as an acceptor[36]. A commonality between  
524 our study and theirs is the use of mammalian cells lines. This coupled with our  
525 transfection time course data (Fig 6) suggest that poor maturation efficiency of the Ruby  
526 series may play a part in mRuby3's poor performance 1-3 days post transfection. This  
527 would also help explain the dysregulation in mNeonGreen and mRuby3 levels we saw  
528 under confocal microscopy in cells transiently transfected with the NG-Ruby3 tandem  
529 one day post transfection (Fig 5), even when the full tandem appears to be present as  
530 determined by western blot (S3 Fig). Poor protein stability could also cause similar

531 results shown here. The NG-Scarlet and NG-Cherry constructs utilize the same protein  
532 linker as NG-Ruby3 but no cells expressing them reported lifetimes similar to those of  
533 the donor only control in the FLIM assay (Fig 4A). Additionally, western blotting of cells  
534 expressing the NG-Ruby3 construct do not show a band corresponding to free  
535 mNeonGreen (S3 Fig), but all three tandems show a band between 37 and 50kDa. This  
536 suggests that the linker is not a substrate for intracellular proteases, but some part of  
537 the red FPs may be. Consistent with this, cleavage of the original mRuby protein has  
538 been reported, although the exact cleavage site was not discovered[37]. Whether  
539 cleavage of mRuby3 plays a role in its behavior in mammalian cells remains unclear.  
540 The western blot does suggest that all of these red FPs may undergo some consistent  
541 cleavage, producing a species with a molecular weight of just under 50 kDa, but why  
542 that would affect mRuby3's performance but not mScarlet-I or mCherry's performance is  
543 still unknown. Although we cannot definitively explain the causes, we can conclude that  
544 mScarlet-I is a superior choice for Green/Red FRET, and possibly other fluorescent  
545 microscopy experiments for a variety of reasons discussed here.

546

## 547 **Conclusion**

548 In this study, we test the viability of mNeonGreen as a FRET donor, and  
549 mRuby3, mScarlet-I, and mCherry as FRET acceptors. We find that mNeonGreen  
550 performs well as a FRET donor in both intensimetric and 2-photon FLIM experiments.  
551 When testing the red FPs as acceptors for mNeonGreen, we found that both mScarlet-I  
552 and mCherry were readily able to FRET with mNeonGreen. These proteins performed  
553 equally well in FLIM experiments, but mScarlet-I outperformed mCherry in the  
554 intensimetric study due to its higher quantum yield. In contrast, we find that mRuby3

555 performs poorly as a FRET acceptor in mammalian systems, despite it being predicted  
556 to be the best FRET acceptor of the three proteins. The reason for this poor  
557 performance remains unclear, although it is likely a combination of poor maturation  
558 efficiency and poor protein stability.

559 Overall, we found that mNeonGreen makes an excellent green-yellow donor, and  
560 mScarlet-I is one of the best all-around acceptors for green-red FRET experiments  
561 utilizing fluorescent proteins.

562

## 563 **Acknowledgements**

564 We would like to thank both David Yule and Andrew Wojtovich for helpful comments  
565 over the course of the study, as well as generous sharing of equipment.

566

## 567 **References**

- 568 1. Prasher DC, Eckenrode VK, Ward WW, Prendergast FG, Cormier MJ. Primary  
569 structure of the *Aequorea victoria* green-fluorescent protein. *Gene*. 1992;111(2):229-33.  
570 doi: [https://doi.org/10.1016/0378-1119\(92\)90691-H](https://doi.org/10.1016/0378-1119(92)90691-H).
- 571 2. Matz MV, Fradkov AF, Labas YA, Savitsky AP, Zaraisky AG, Markelov ML, et al.  
572 Fluorescent proteins from nonbioluminescent Anthozoa species. *Nature biotechnology*.  
573 1999;17(10):969-73. doi: 10.1038/13657.
- 574 3. Wiedenmann J, Schenk A, Rocker C, Girod A, Spindler KD, Nienhaus GU. A far-  
575 red fluorescent protein with fast maturation and reduced oligomerization tendency from  
576 *Entacmaea quadricolor* (Anthozoa, Actinaria). *Proc Natl Acad Sci U S A*.



- 577 2002;99(18):11646-51. Epub 2002/08/20. doi: 10.1073/pnas.182157199. PubMed  
578 PMID: 12185250; PubMed Central PMCID: PMCPMC129323.
- 579 4. Shaner NC, Lambert GG, Chammas A, Ni Y, Cranfill PJ, Baird MA, et al. A bright  
580 monomeric green fluorescent protein derived from *Branchiostoma lanceolatum*. *Nature*  
581 *methods*. 2013;10(5):407-9. Epub 2013/03/26. doi: 10.1038/nmeth.2413. PubMed  
582 PMID: 23524392; PubMed Central PMCID: PMCPMC3811051.
- 583 5. Aliye N, Fabbretti A, Lupidi G, Tsekoa T, Spurio R. Engineering color variants of  
584 green fluorescent protein (GFP) for thermostability, pH-sensitivity, and improved folding  
585 kinetics. *Applied microbiology and biotechnology*. 2015;99(3):1205-16. Epub  
586 2014/08/13. doi: 10.1007/s00253-014-5975-1. PubMed PMID: 25112226.
- 587 6. Shaner NC, Campbell RE, Steinbach PA, Giepmans BN, Palmer AE, Tsien RY.  
588 Improved monomeric red, orange and yellow fluorescent proteins derived from  
589 *Discosoma* sp. red fluorescent protein. *Nature biotechnology*. 2004;22(12):1567-72.  
590 Epub 2004/11/24. doi: 10.1038/nbt1037. PubMed PMID: 15558047.
- 591 7. Bayle V, Nussaume L, Bhat RA. Combination of novel green fluorescent protein  
592 mutant TSapphire and DsRed variant mOrange to set up a versatile in planta FRET-  
593 FLIM assay. *Plant physiology*. 2008;148(1):51-60. Epub 2008/07/16. doi:  
594 10.1104/pp.108.117358. PubMed PMID: 18621983; PubMed Central PMCID:  
595 PMCPMC2528103.
- 596 8. Kredel S, Oswald F, Nienhaus K, Deuschle K, Rocker C, Wolff M, et al. mRuby, a  
597 bright monomeric red fluorescent protein for labeling of subcellular structures. *PLoS*  
598 *One*. 2009;4(2):e4391. Epub 2009/02/06. doi: 10.1371/journal.pone.0004391. PubMed  
599 PMID: 19194514; PubMed Central PMCID: PMCPMC2633614.

- 600 9. Lam AJ, St-Pierre F, Gong Y, Marshall JD, Cranfill PJ, Baird MA, et al. Improving  
601 FRET dynamic range with bright green and red fluorescent proteins. *Nature methods*.  
602 2012;9:1005. doi: 10.1038/nmeth.2171  
603 <https://www.nature.com/articles/nmeth.2171#supplementary-information>.
- 604 10. Bajar BT, Wang ES, Lam AJ, Kim BB, Jacobs CL, Howe ES, et al. Improving  
605 brightness and photostability of green and red fluorescent proteins for live cell imaging  
606 and FRET reporting. *Scientific Reports*. 2016;6:20889. doi: 10.1038/srep20889  
607 <https://www.nature.com/articles/srep20889#supplementary-information>.
- 608 11. Bindels DS, Haarbosch L, van Weeren L, Postma M, Wiese KE, Mastop M, et al.  
609 mScarlet: a bright monomeric red fluorescent protein for cellular imaging. *Nature*  
610 *methods*. 2017;14(1):53-6. Epub 2016/11/22. doi: 10.1038/nmeth.4074. PubMed PMID:  
611 27869816.
- 612 12. Rodriguez EA, Campbell RE, Lin JY, Lin MZ, Miyawaki A, Palmer AE, et al. The  
613 Growing and Glowing Toolbox of Fluorescent and Photoactive Proteins. *Trends in*  
614 *biochemical sciences*. 2017;42(2):111-29. Epub 2016/11/07. doi:  
615 10.1016/j.tibs.2016.09.010. PubMed PMID: 27814948; PubMed Central PMCID:  
616 PMC5272834.
- 617 13. Kremers G-J, Gilbert SG, Cranfill PJ, Davidson MW, Piston DW. Fluorescent  
618 proteins at a glance. *Journal of Cell Science*. 2011;124(2):157-60. doi:  
619 10.1242/jcs.072744.
- 620 14. Chudakov DM, Matz MV, Lukyanov S, Lukyanov KA. Fluorescent Proteins and  
621 Their Applications in Imaging Living Cells and Tissues. *Physiological Reviews*.  
622 2010;90(3):1103-63. doi: 10.1152/physrev.00038.2009. PubMed PMID: 20664080.
- 623 15. Lambert TJ. FPbase: a community-editable fluorescent protein database. *Nature*  
624 *methods*. 2019;16(4):277-8. doi: 10.1038/s41592-019-0352-8.

- 625 16. Greenwald EC, Mehta S, Zhang J. Genetically Encoded Fluorescent Biosensors  
626 Illuminate the Spatiotemporal Regulation of Signaling Networks. *Chemical Reviews*.  
627 2018;118(24):11707-94. doi: 10.1021/acs.chemrev.8b00333.
- 628 17. Vogel SS, Thaler C, Koushik SV. Fanciful FRET. *Science's STKE : signal*  
629 *transduction knowledge environment*. 2006;2006(331):re2. Epub 2006/04/20. doi:  
630 10.1126/stke.3312006re2. PubMed PMID: 16622184.
- 631 18. Wall AC, Gius JP, Buglewicz DJ, Banks AB, Kato TA. Oxidative stress and  
632 endoreduplication induced by blue light exposure to CHO cells. *Mutation research*.  
633 2019;841:31-5. Epub 2019/05/30. doi: 10.1016/j.mrgentox.2019.05.003. PubMed PMID:  
634 31138408.
- 635 19. Shibuya K, Onodera S, Hori M. Toxic wavelength of blue light changes as insects  
636 grow. *PLoS One*. 2018;13(6):e0199266. Epub 2018/06/20. doi:  
637 10.1371/journal.pone.0199266. PubMed PMID: 29920536; PubMed Central PMCID:  
638 PMCPMC6007831.
- 639 20. Arthaut LD, Jourdan N, Mteyrek A, Procopio M, El-Esawi M, d'Harlingue A, et al.  
640 Blue-light induced accumulation of reactive oxygen species is a consequence of the  
641 *Drosophila* cryptochrome photocycle. *PLoS One*. 2017;12(3):e0171836. Epub  
642 2017/03/16. doi: 10.1371/journal.pone.0171836. PubMed PMID: 28296892; PubMed  
643 Central PMCID: PMCPMC5351967.
- 644 21. Nakanishi-Ueda T, Majima HJ, Watanabe K, Ueda T, Indo HP, Suenaga S, et al.  
645 Blue LED light exposure develops intracellular reactive oxygen species, lipid  
646 peroxidation, and subsequent cellular injuries in cultured bovine retinal pigment  
647 epithelial cells. *Free Radical Research*. 2013;47(10):774-80. doi:  
648 10.3109/10715762.2013.829570.

- 649 22. Jou MJ, Jou SB, Guo MJ, Wu HY, Peng TI. Mitochondrial reactive oxygen  
650 species generation and calcium increase induced by visible light in astrocytes. *Ann N Y*  
651 *Acad Sci.* 2004;1011:45-56. Epub 2004/05/06. PubMed PMID: 15126282.
- 652 23. Siegel AP, Baird MA, Davidson MW, Day RN. Strengths and weaknesses of  
653 recently engineered red fluorescent proteins evaluated in live cells using fluorescence  
654 correlation spectroscopy. *International journal of molecular sciences.*  
655 2013;14(10):20340-58. Epub 2013/10/17. doi: 10.3390/ijms141020340. PubMed PMID:  
656 24129172; PubMed Central PMCID: PMC3821618.
- 657 24. Shemiakina II, Ermakova GV, Cranfill PJ, Baird MA, Evans RA, Souslova EA, et  
658 al. A monomeric red fluorescent protein with low cytotoxicity. *Nature communications.*  
659 2012;3:1204. doi: 10.1038/ncomms2208  
660 <https://www.nature.com/articles/ncomms2208#supplementary-information>.
- 661 25. Hoffman RM. Chapter eleven - Live Cell Imaging in Live Animals with  
662 Fluorescent Proteins. In: Conn PM, editor. *Methods in Enzymology.* 506: Academic  
663 Press; 2012. p. 197-224.
- 664 26. Campbell RE, Tour O, Palmer AE, Steinbach PA, Baird GS, Zacharias DA, et al.  
665 A monomeric red fluorescent protein. *Proceedings of the National Academy of*  
666 *Sciences.* 2002;99(12):7877-82. doi: 10.1073/pnas.082243699.
- 667 27. Lin F, Zhang C, Du M, Wang L, Mai Z, Chen T. Superior robustness of ExEm-  
668 spFRET to llem-spFRET method in live-cell FRET measurement. *Journal of*  
669 *microscopy.* 2018;272(2):145-50. Epub 2018/10/20. doi: 10.1111/jmi.12755. PubMed  
670 PMID: 30338530.
- 671 28. Koushik SV, Chen H, Thaler C, Puhl HL, 3rd, Vogel SS. Cerulean, Venus, and  
672 VenusY67C FRET reference standards. *Biophys J.* 2006;91(12):L99-I101. Epub

- 673 2006/10/17. doi: 10.1529/biophysj.106.096206. PubMed PMID: 17040988; PubMed  
674 Central PMCID: PMCPMC1779932.
- 675 29. Schindelin J, Arganda-Carreras I, Frise E, Kaynig V, Longair M, Pietzsch T, et al.  
676 Fiji: an open-source platform for biological-image analysis. *Nature methods*.  
677 2012;9(7):676-82. Epub 2012/06/30. doi: 10.1038/nmeth.2019. PubMed PMID:  
678 22743772; PubMed Central PMCID: PMCPMC3855844.
- 679 30. Raschka S. MLxtend: Providing machine learning and data science utilities and  
680 extensions to Python's scientific computing stack. *Journal of Open Source Software*.  
681 2018;3(24). doi: 10.21105/joss.00638.
- 682 31. Clavel D, Gotthard G, von Stetten D, De Sanctis D, Pasquier H, Lambert GG, et  
683 al. Structural analysis of the bright monomeric yellow-green fluorescent protein  
684 mNeonGreen obtained by directed evolution. *Acta crystallographica Section D,*  
685 *Structural biology*. 2016;72(Pt 12):1298-307. Epub 2016/12/06. doi:  
686 10.1107/s2059798316018623. PubMed PMID: 27917830; PubMed Central PMCID:  
687 PMCPMC5137226.
- 688 32. Padilla-Parra S, Auduge N, Lalucque H, Mevel JC, Coppey-Moisan M, Tramier  
689 M. Quantitative comparison of different fluorescent protein couples for fast FRET-FLIM  
690 acquisition. *Biophys J*. 2009;97(8):2368-76. Epub 2009/10/22. doi:  
691 10.1016/j.bpj.2009.07.044. PubMed PMID: 19843469; PubMed Central PMCID:  
692 PMCPMC2764072.
- 693 33. Molina RS, Tran TM, Campbell RE, Lambert GG, Salih A, Shaner NC, et al.  
694 Blue-Shifted Green Fluorescent Protein Homologues Are Brighter than Enhanced  
695 Green Fluorescent Protein under Two-Photon Excitation. *The Journal of Physical*  
696 *Chemistry Letters*. 2017;8(12):2548-54. doi: 10.1021/acs.jpcclett.7b00960.

- 697 34. Mastop M, Bindels DS, Shaner NC, Postma M, Gadella TWJ, Jr., Goedhart J.  
698 Characterization of a spectrally diverse set of fluorescent proteins as FRET acceptors  
699 for mTurquoise2. *Sci Rep.* 2017;7(1):11999. Epub 2017/09/22. doi: 10.1038/s41598-  
700 017-12212-x. PubMed PMID: 28931898; PubMed Central PMCID: PMC5607329.
- 701 35. George Abraham B, Sarkisyan KS, Mishin AS, Santala V, Tkachenko NV, Karp  
702 M. Fluorescent Protein Based FRET Pairs with Improved Dynamic Range for  
703 Fluorescence Lifetime Measurements. *PLoS One.* 2015;10(8):e0134436. Epub  
704 2015/08/04. doi: 10.1371/journal.pone.0134436. PubMed PMID: 26237400; PubMed  
705 Central PMCID: PMC4523203.
- 706 36. Martin KJ, McGhee EJ, Schwarz JP, Drysdale M, Brachmann SM, Stucke V, et  
707 al. Accepting from the best donor; analysis of long-lifetime donor fluorescent protein  
708 pairings to optimise dynamic FLIM-based FRET experiments. *PLoS One.*  
709 2018;13(1):e0183585. Epub 2018/01/03. doi: 10.1371/journal.pone.0183585. PubMed  
710 PMID: 29293509; PubMed Central PMCID: PMC5749721.
- 711 37. Akerboom J, Carreras Calderón N, Tian L, Wabnig S, Prigge M, Tolö J, et al.  
712 Genetically encoded calcium indicators for multi-color neural activity imaging and  
713 combination with optogenetics. *Frontiers in Molecular Neuroscience.* 2013;6(2). doi:  
714 10.3389/fnmol.2013.00002.

715

## 716 Supplemental Information

717 **S1 Fig. Construct emission scans used for spectral FRET.** (A) Emission scans of several independent  
718 transfections of NG-Stop when excited at 470 nm overlaid with the reported emission of pure mNeonGreen. The  
719 average of these scans is shown in Fig 2B. Because of the consistency of NG-Stop with the pure mNeonGreen  
720 spectrum, the pure mNeonGreen spectrum was used as the donor spectrum for linear unmixing. Acceptor emission  
721 scans from several independent transfections of (B) NG-Ruby3, (D) NG-Scarlet, and (F) NG-Cherry achieved by  
722 exciting the acceptor directly using 530 and 540 nm light, overlaid with the reported pure spectrum for the red FP in

723 each condition. The average of each condition is shown next to the reported pure spectrum for each acceptor is  
724 shown in **(C)**, **(E)**, and **(G)** respectively. Scan of both mScarlet-I and mCherry in the NG-Scarlet and NG-Cherry  
725 constructs faithfully replicated the upstroke and peak of purified mScarlet-I and mCherry, with the major difference  
726 between the observed and pure protein spectrum being a faster decay of the tail of the spectrum at high wavelengths.  
727 In contrast, the scans of mRuby3 in the NG-Ruby3 construct revealed an emission spectrum that was 6 nm shifted  
728 from what was reported for purified mRuby3. Due to the differences seen with each of the red acceptor proteins and  
729 varying levels of background, custom acceptor emission spectrums were created to serve as the acceptor emission  
730 for linear umixing shown in **(C)**, **(E)**, and **(G)** as the black dashed line. The raw traces used to determine the efficiency  
731 of **(H)** NG-Ruby3, **(I)** NG-Scarlet, and **(J)** NG-Cherry are shown, corresponding to the efficiency graph in Fig 2F.

732

733 **S2 Fig. Workflow for confocal imaging analysis.** Example workflow demonstrating how confocal images were  
734 processed to create intensity slope histograms in Fig 5.

735

736 **S3 Fig. Immunoblot of NG-Stop and NG-Red FP tandem constructs.** 10 µg of total protein derived from cell  
737 transiently transfected with the given construct one day post transfection was loaded into a 16% SDS-PAGE gel and  
738 mNeonGreen was visualized using an anti-mNeonGreen antibody. NG-Stop has a single band near it's predicted  
739 molecular weight of 27kDa. Each of the tandems display two bands, one at the full predicted weight of 54kDa, and  
740 one slightly below 50 kDa. Importantly, the NG-Ruby3 construct does not contain a band at a similar weight as the  
741 band in the NG-Stop lane, indicating that proteolytic cleavage of the NG-Ruby3 construct does not explain the  
742 heterogeneity in cell expressing observed under confocal microscopy.

743

744 **S4 Fig. Example decay curves from the NG-Ruby3 time series. (A)** Example fluorescence decay curves of a  
745 single cells expressing NG-Ruby3 2-5 days post transfection (DPT) representative of the average for each condition.  
746 The NG-Stop curve and NG-Ruby3 1 DPT curves from Fig 3C are also shown for reference. **(B)** Example  
747 fluorescence decay curves from a single cell expressing NG-Ruby3 5 DPT before and after acceptor photobleaching.  
748 The NG-Stop curve from Fig 3C is repeated here for reference.



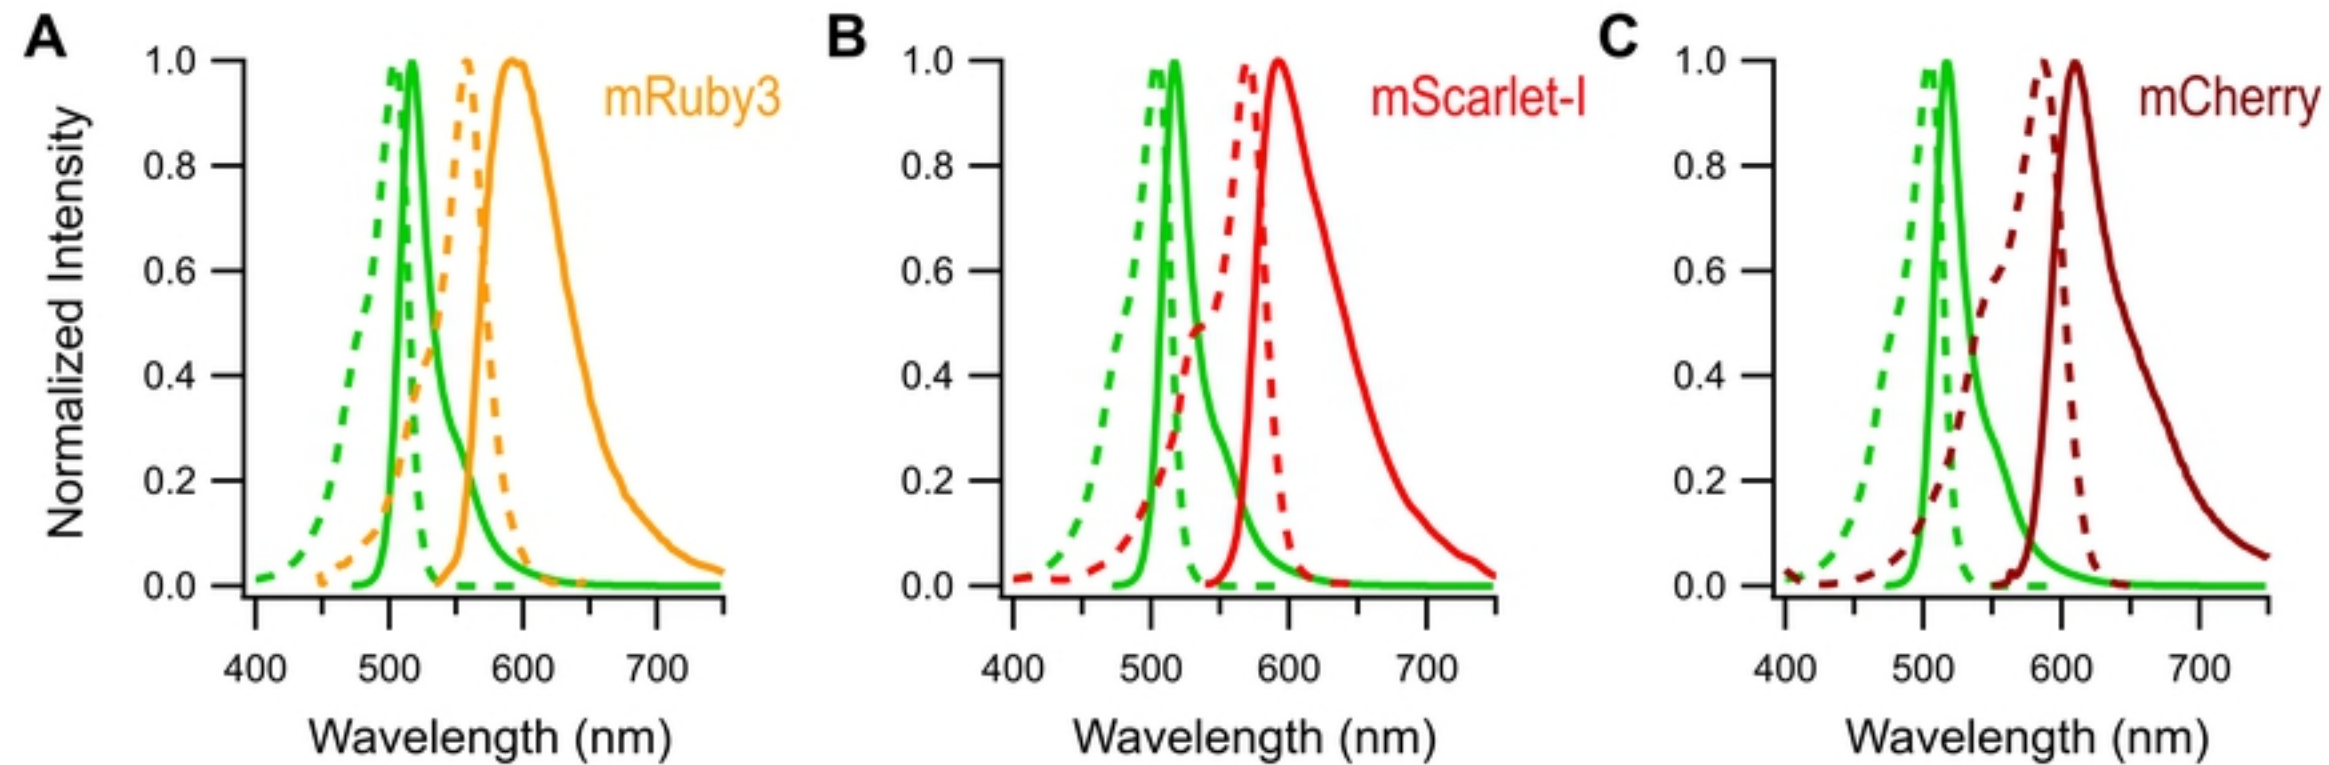

Figure 1



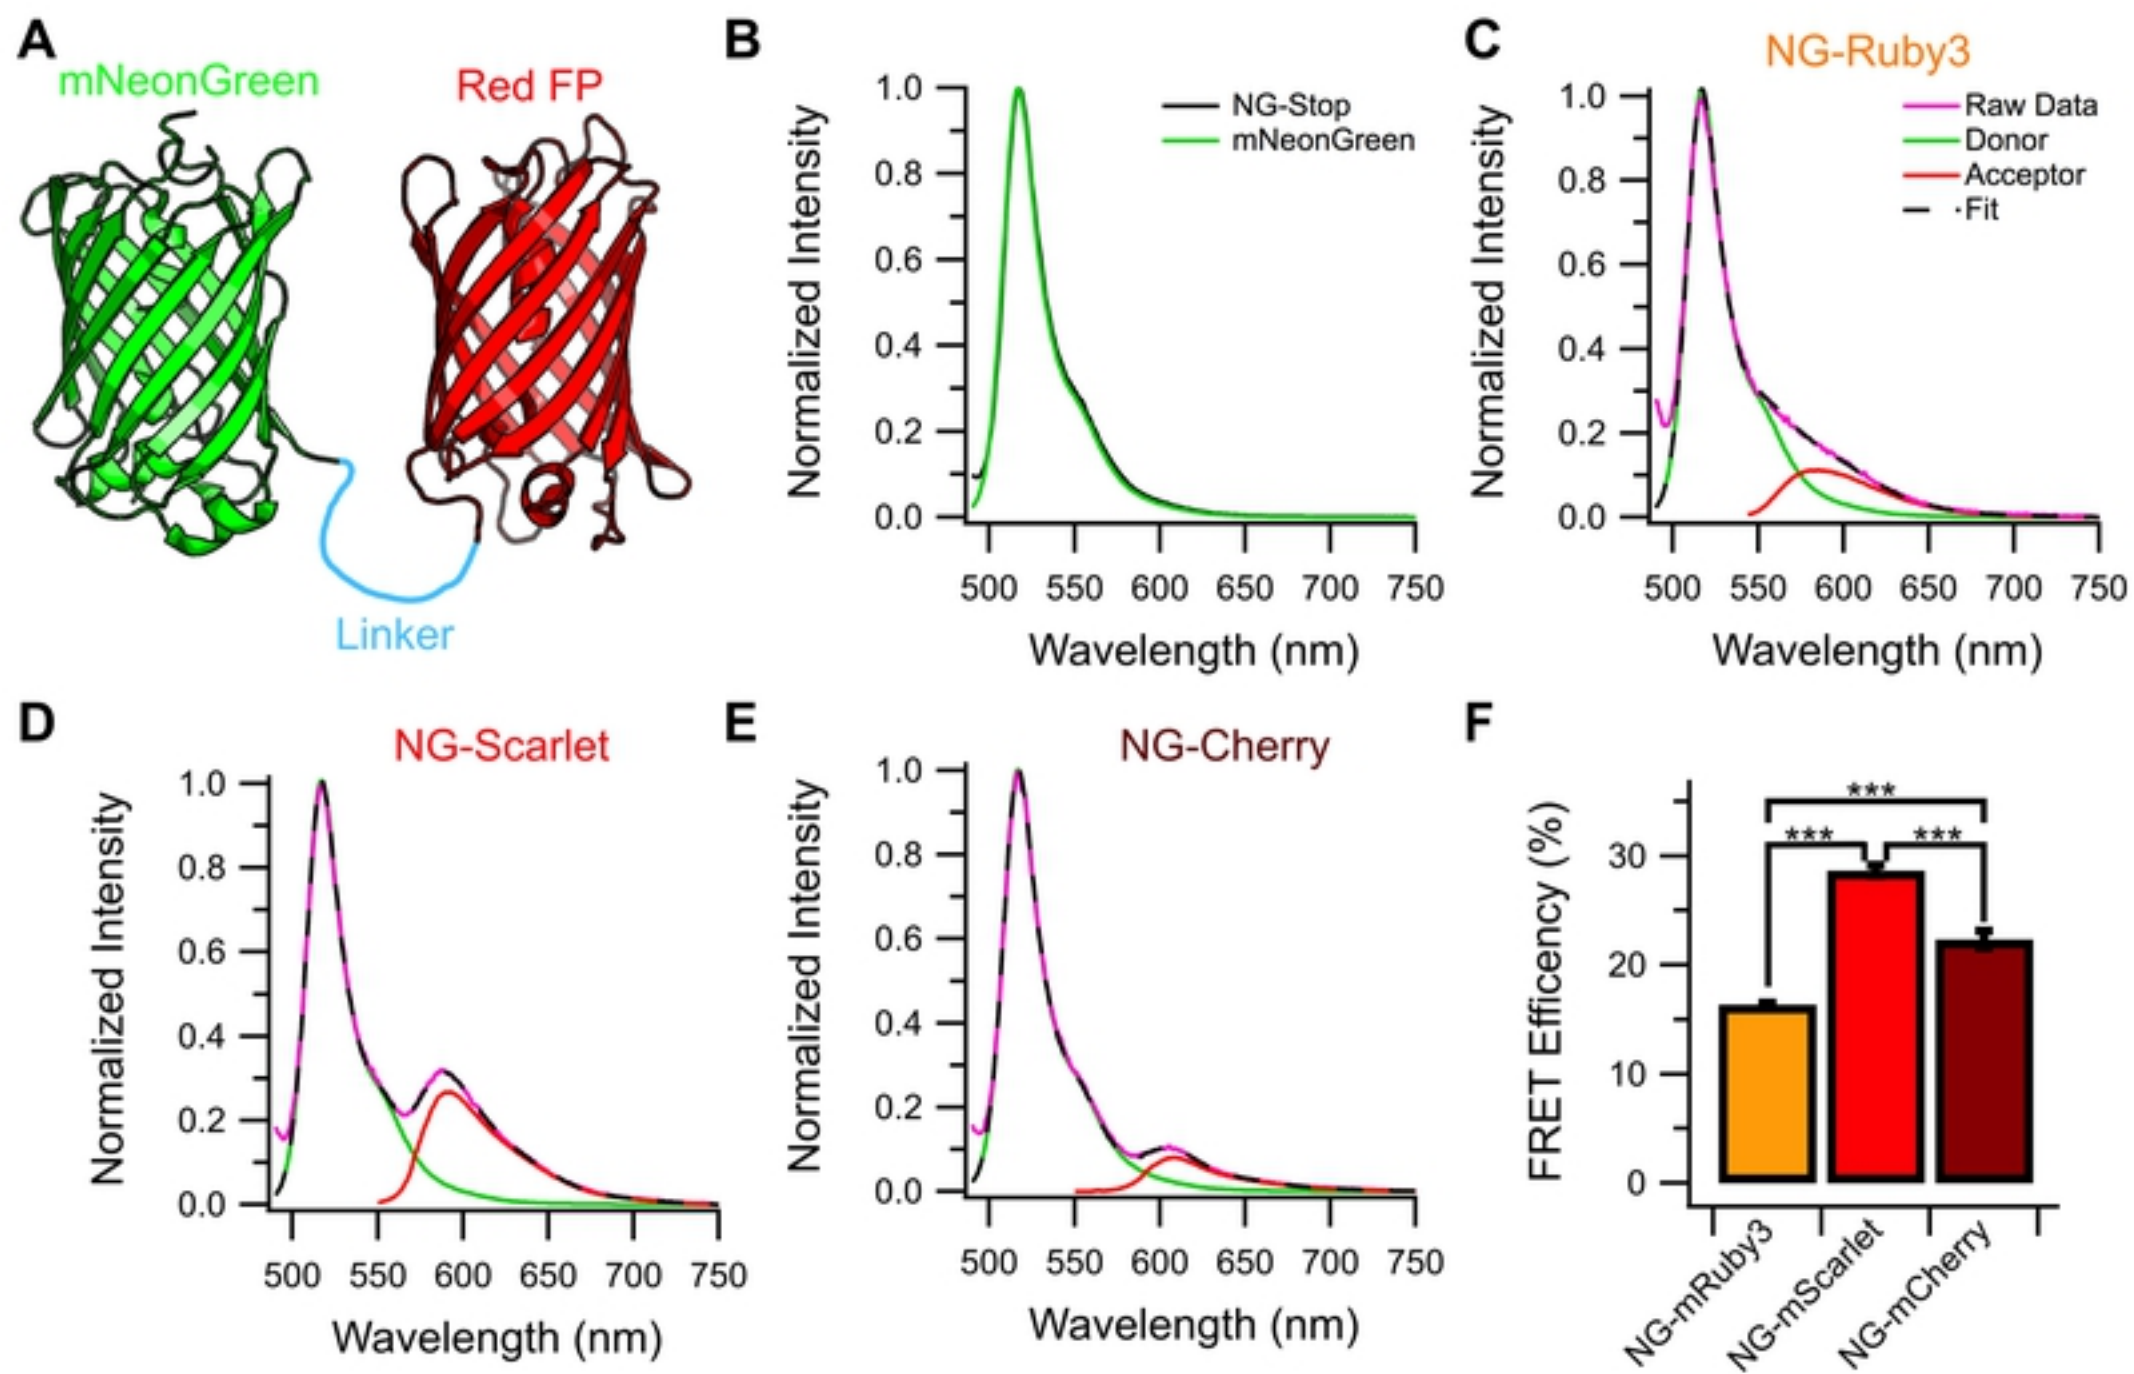

Figure 2

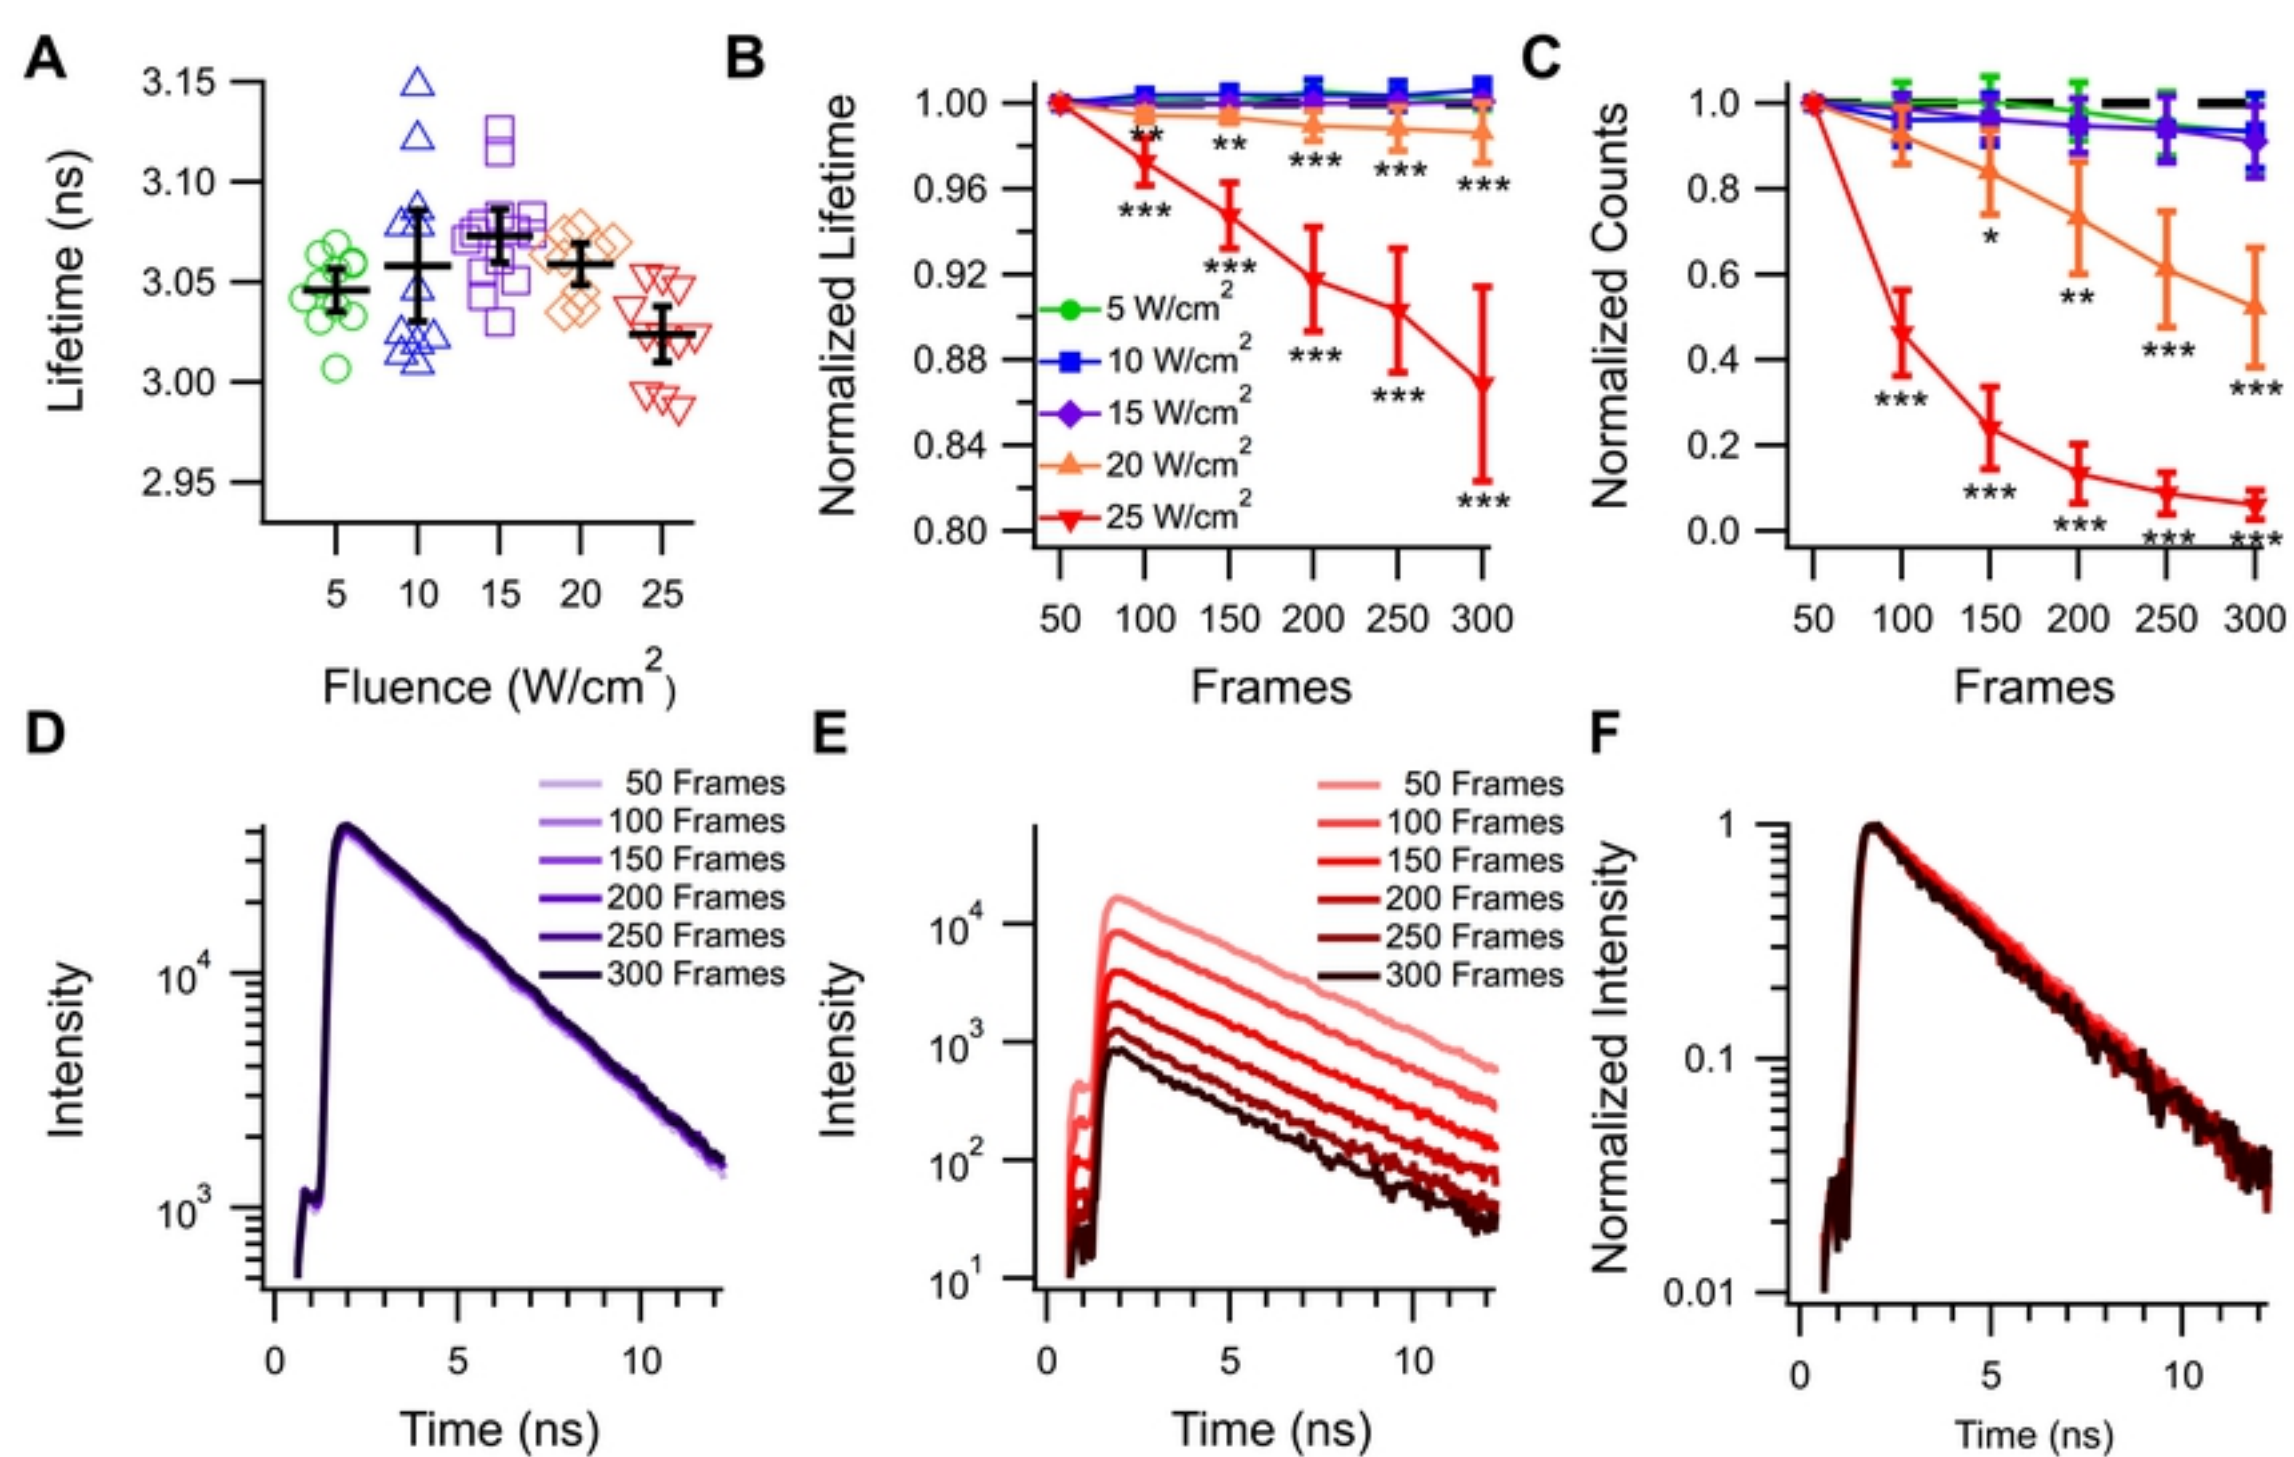

Figure 3

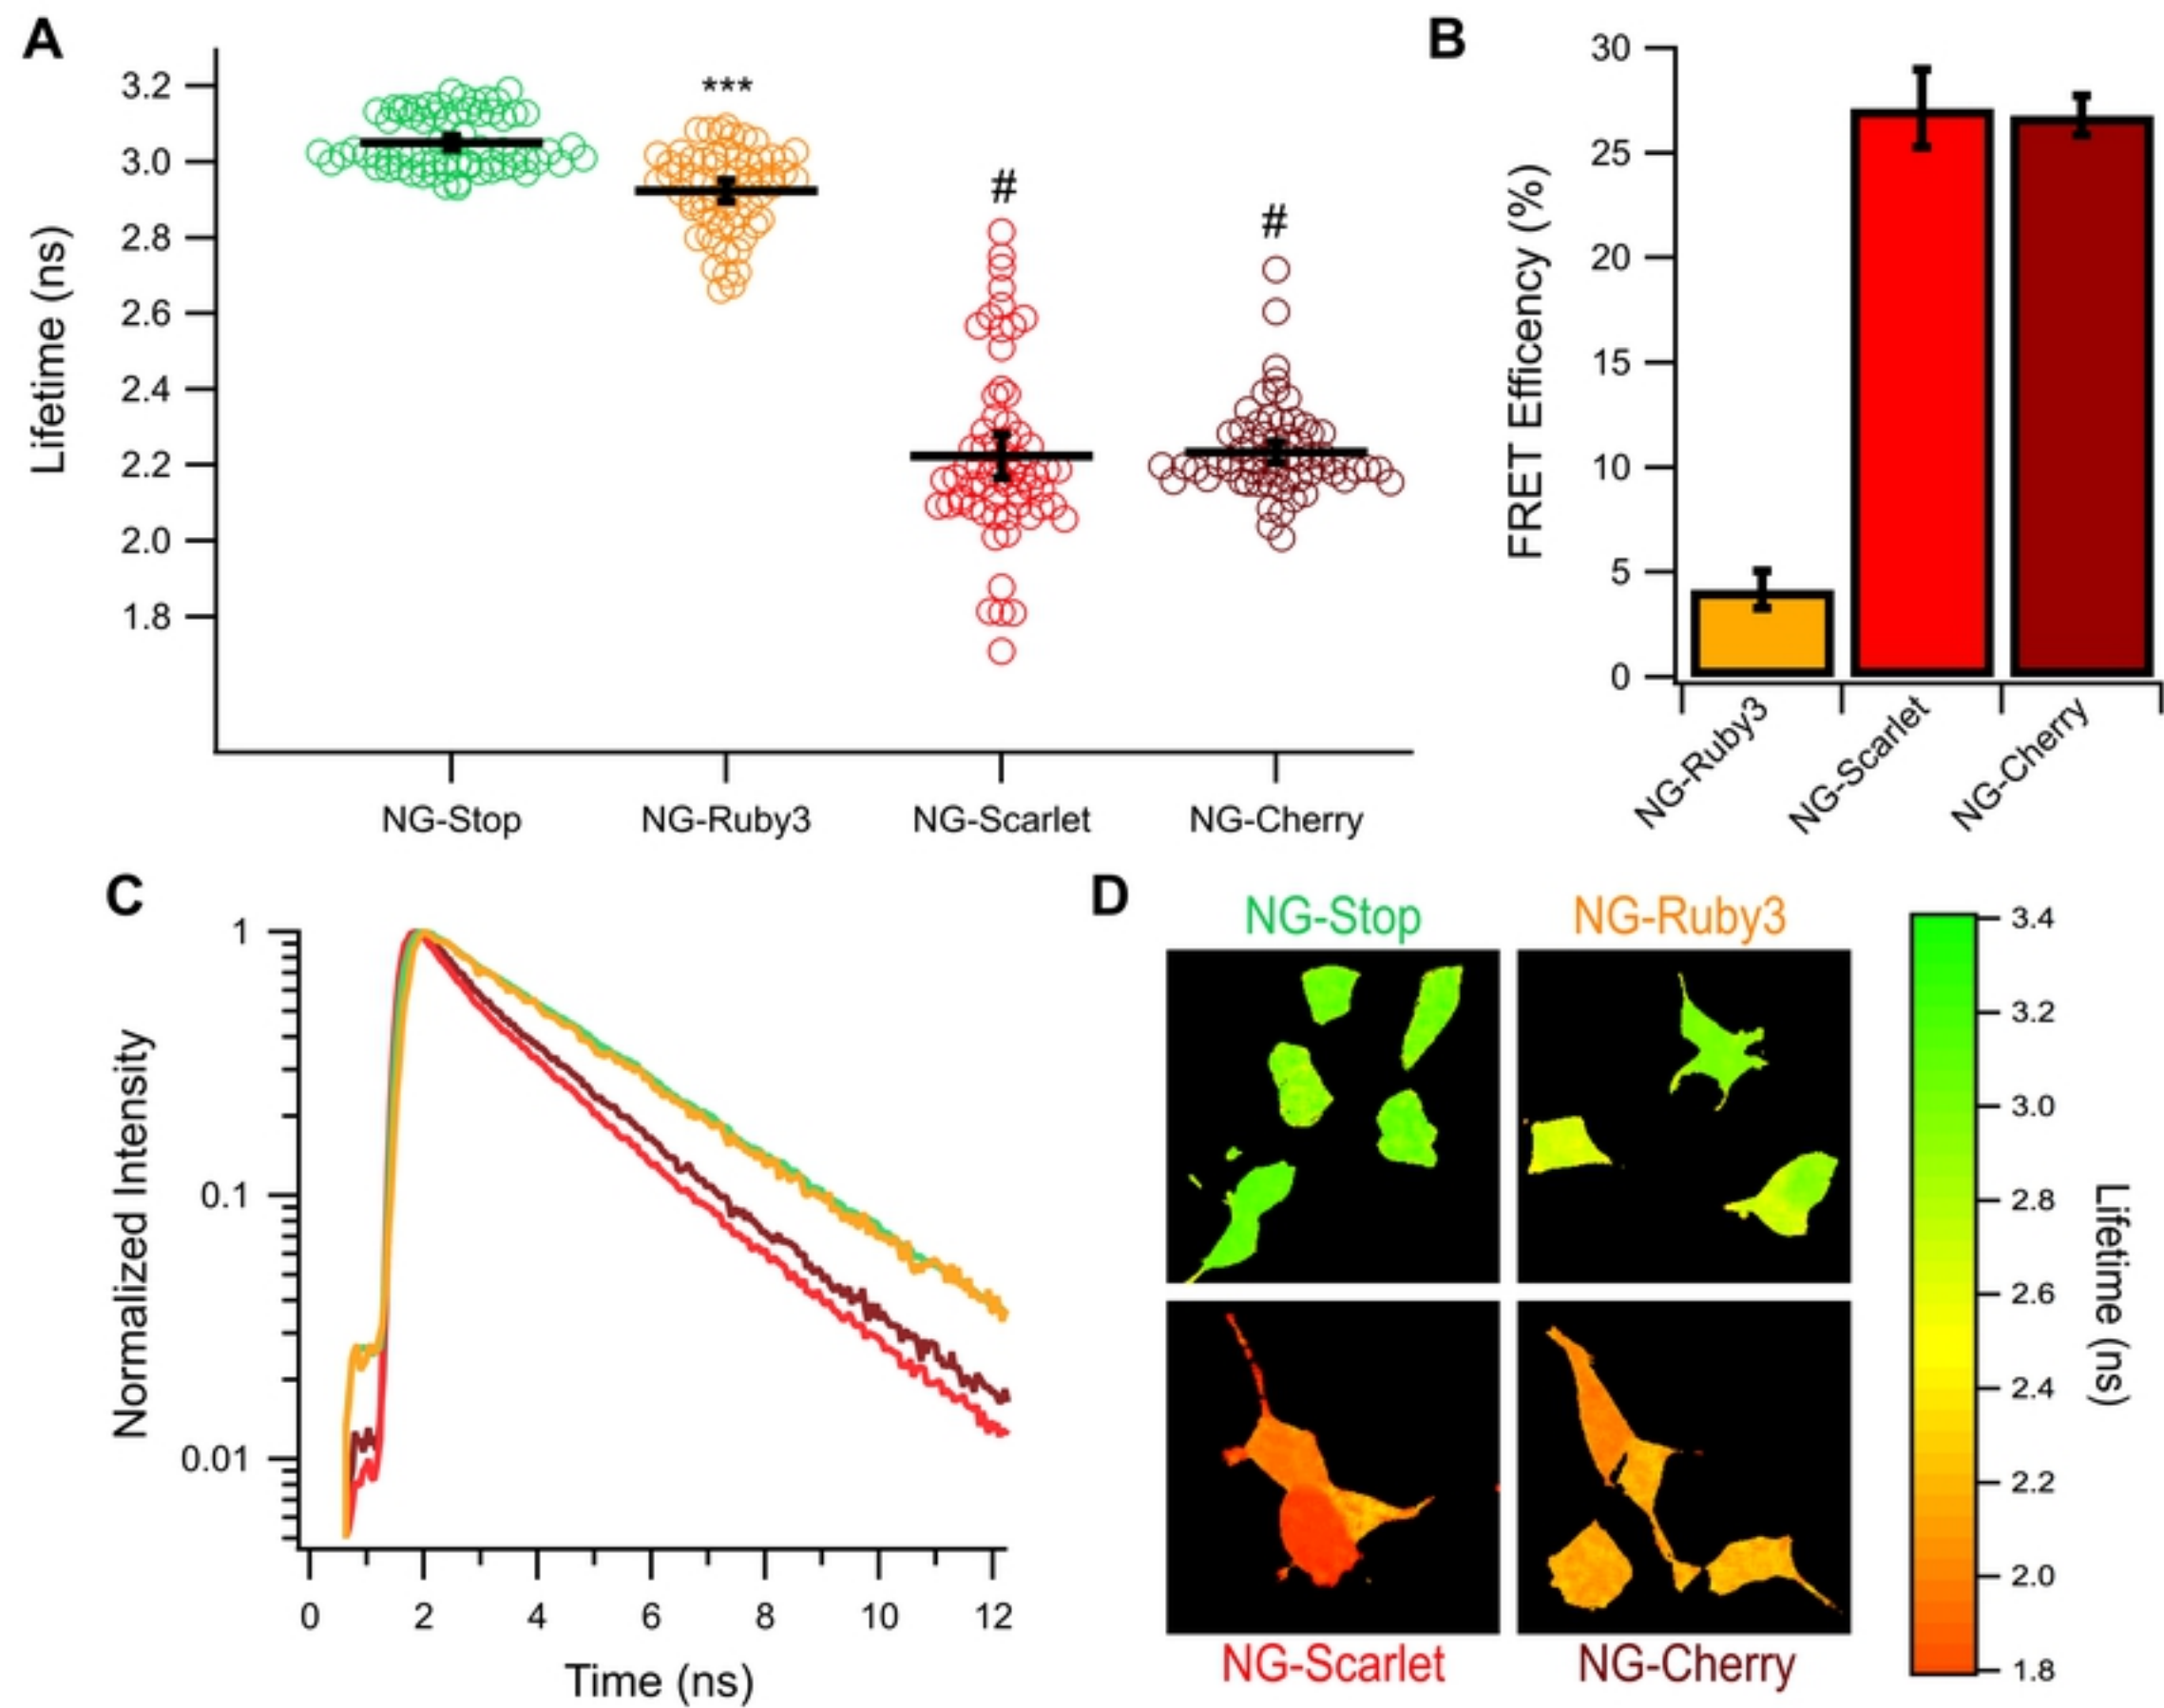

Figure 4



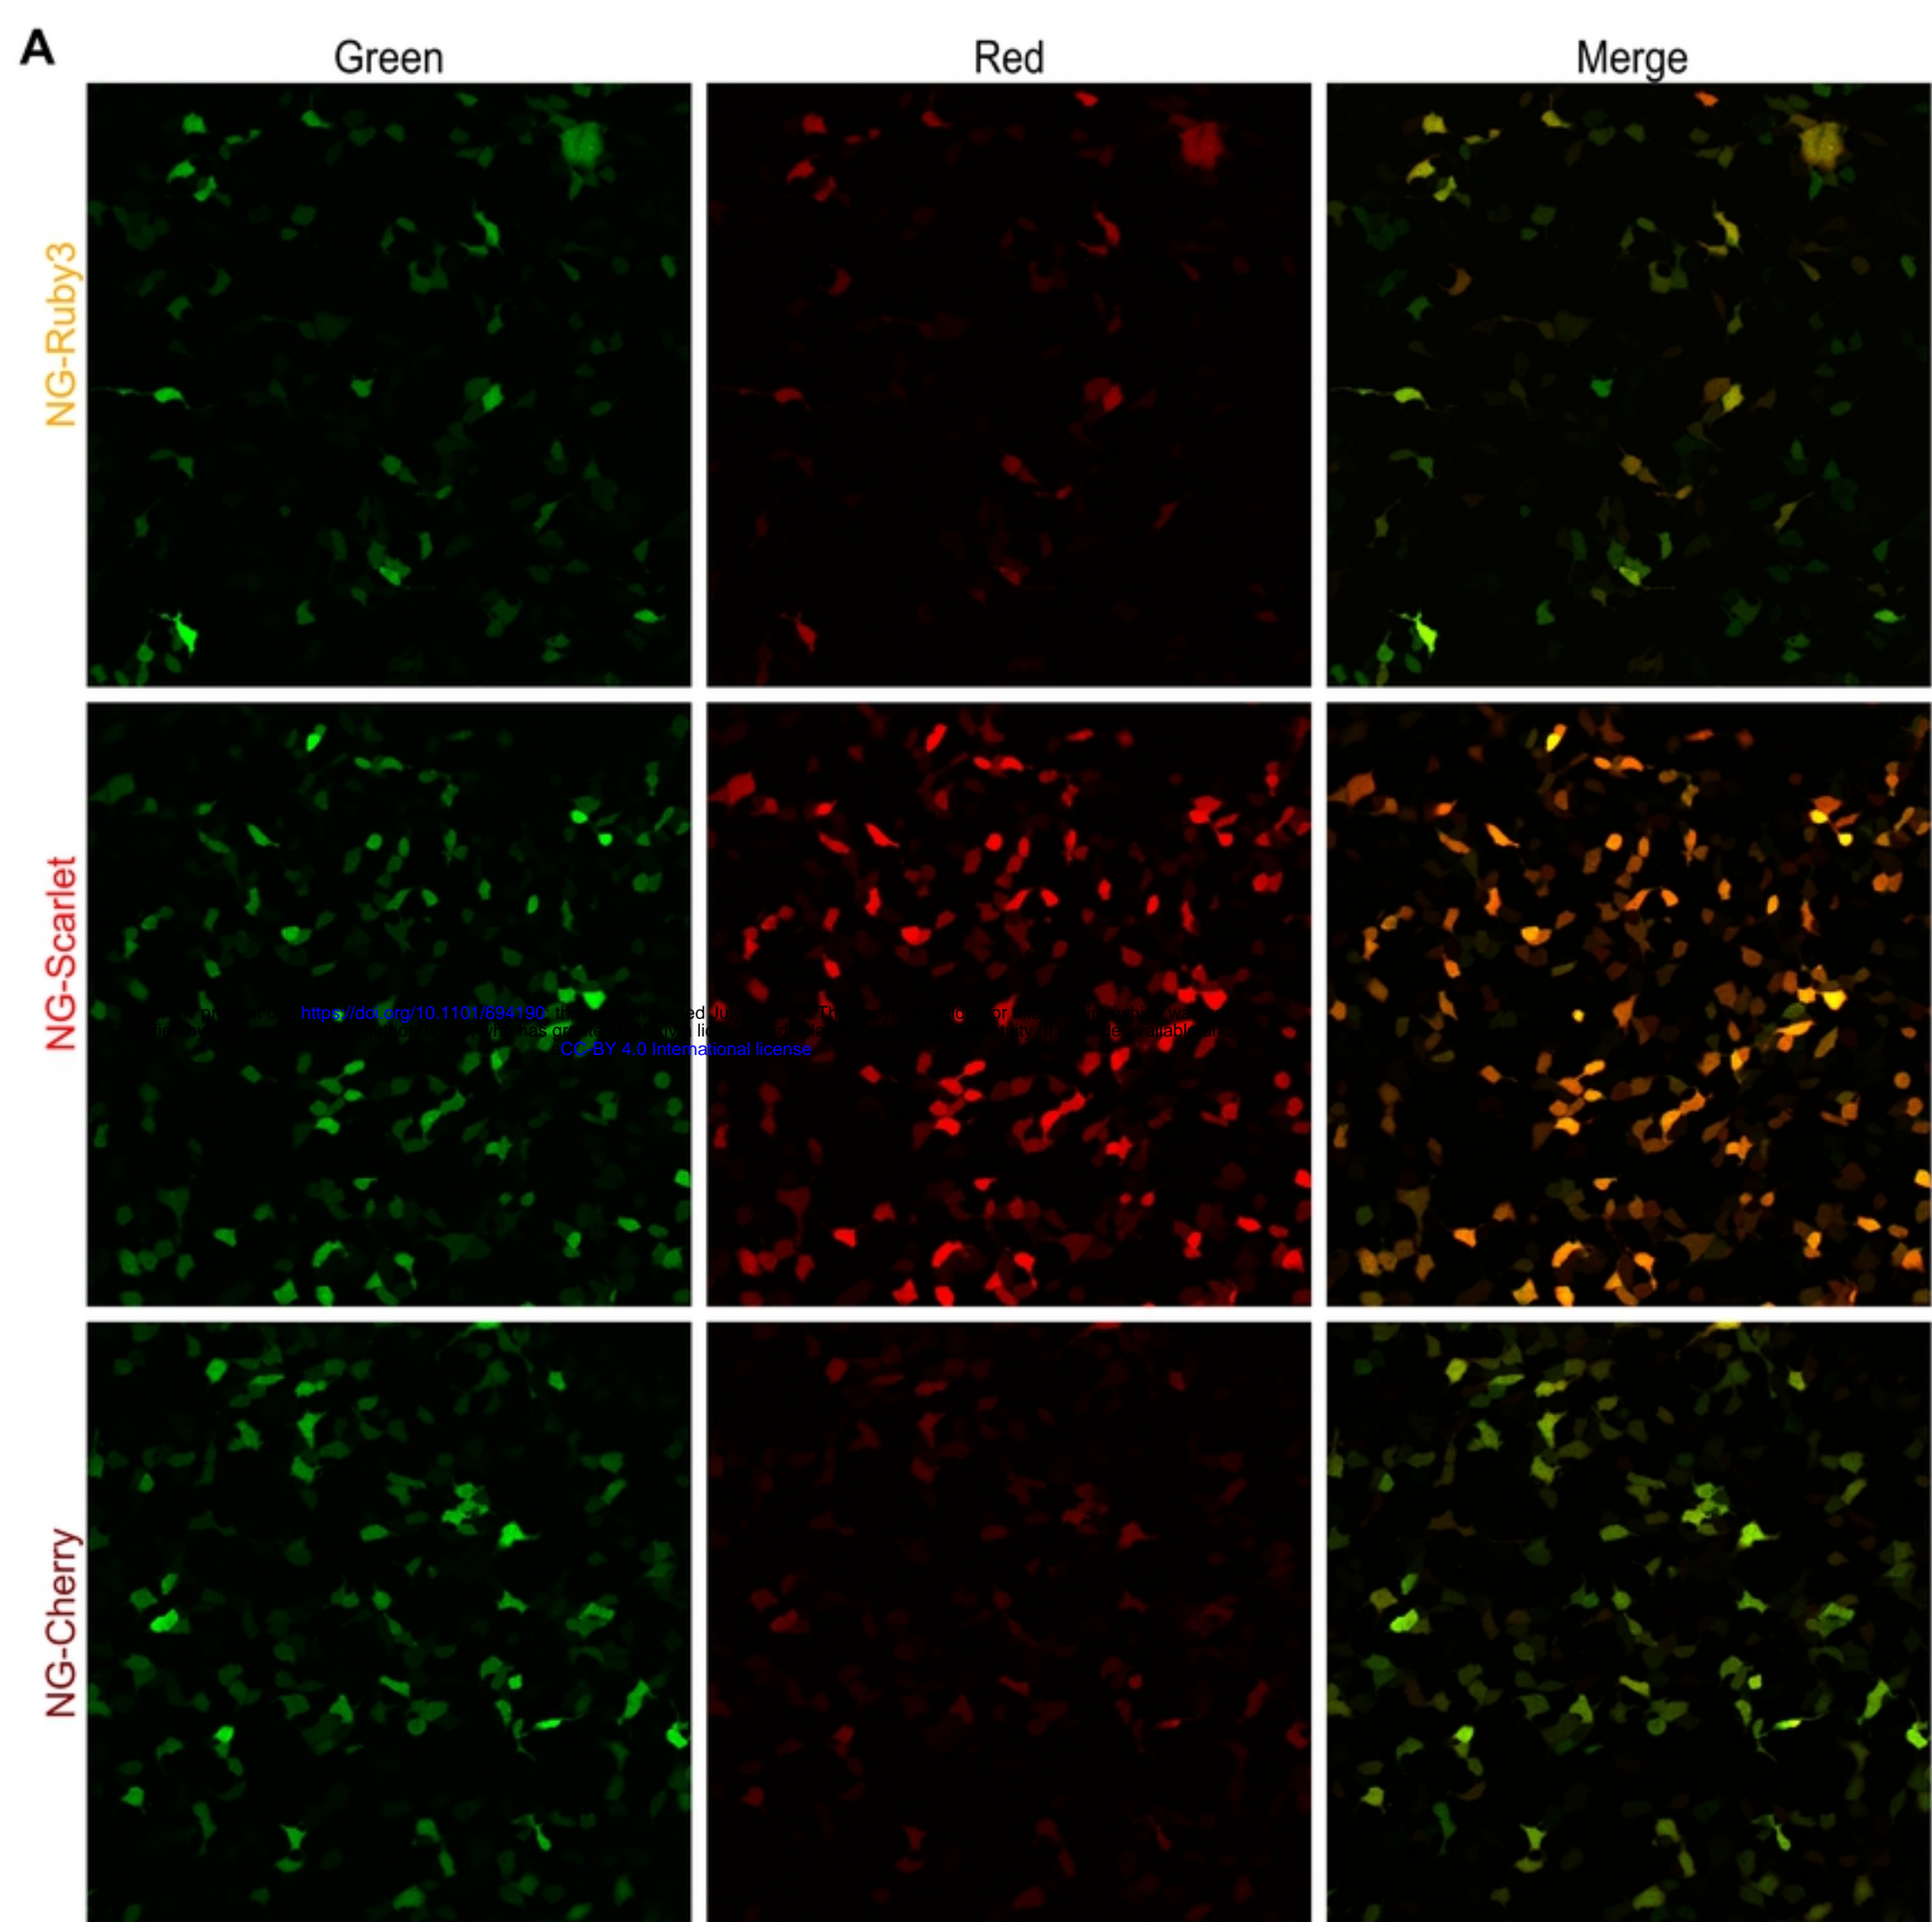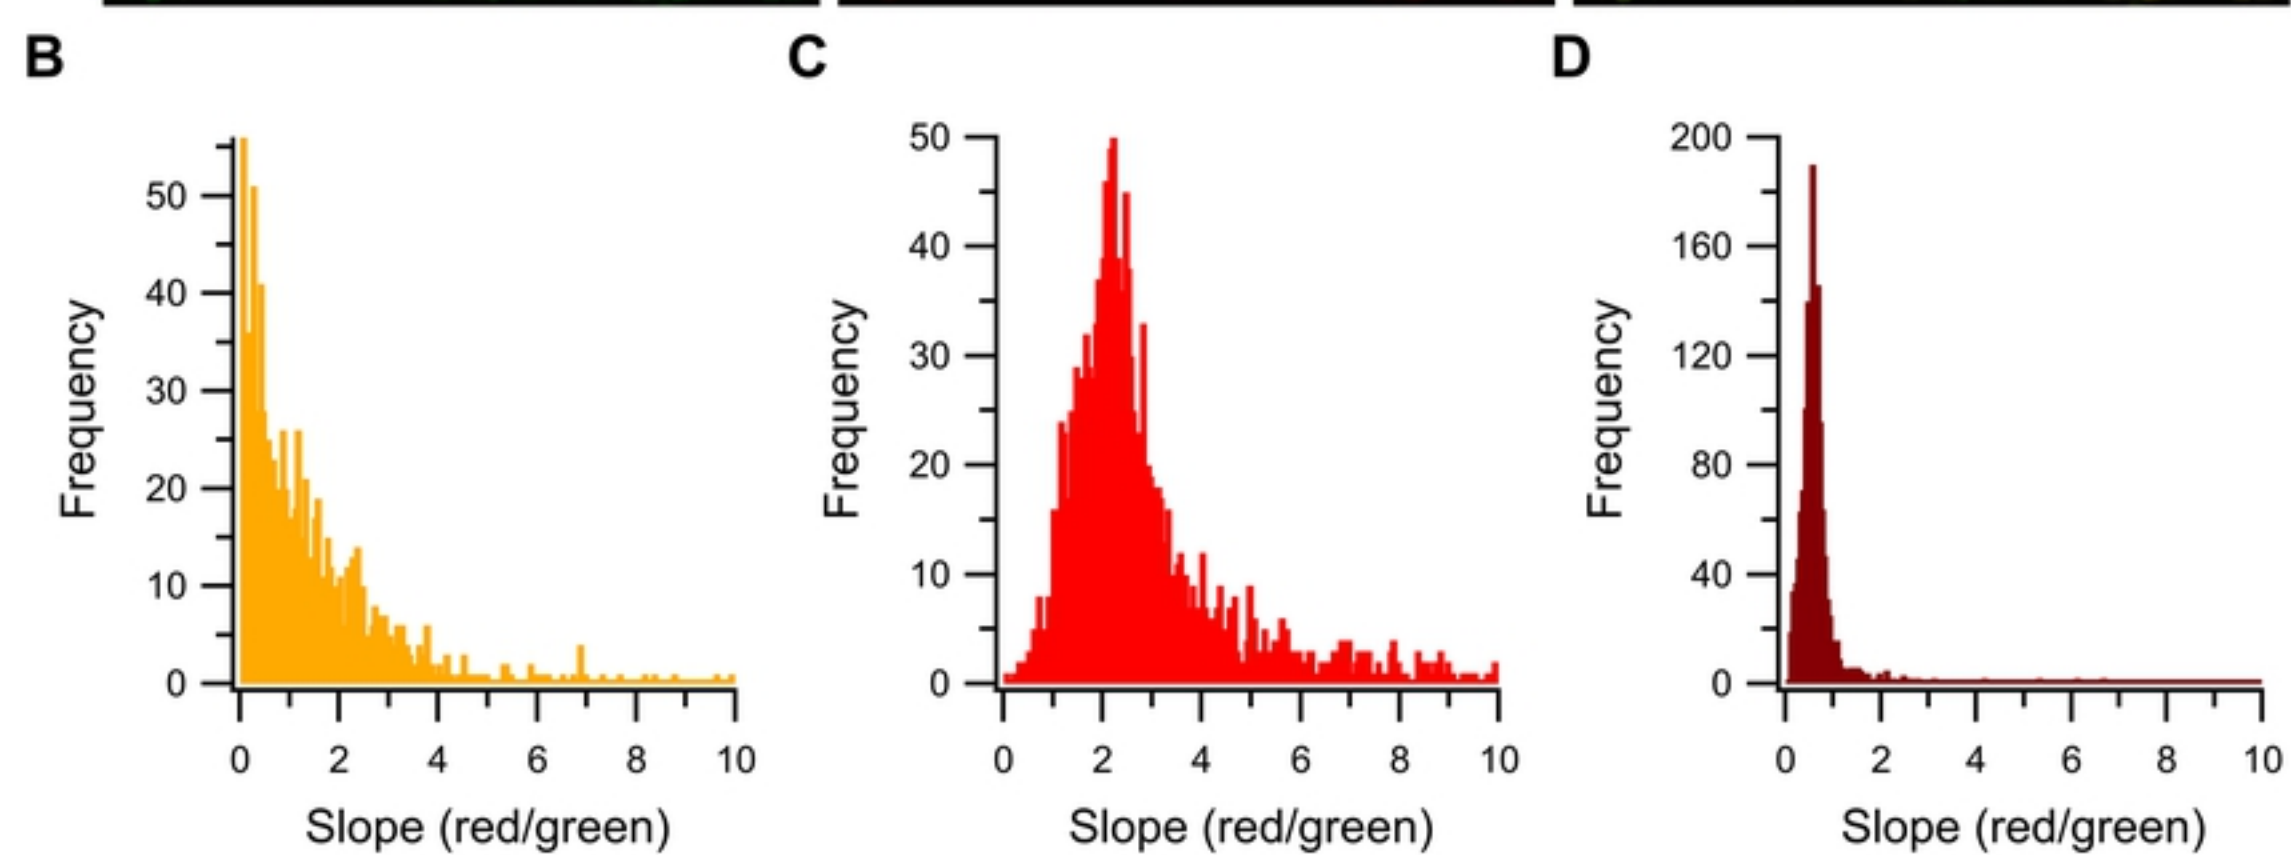

Figure 5

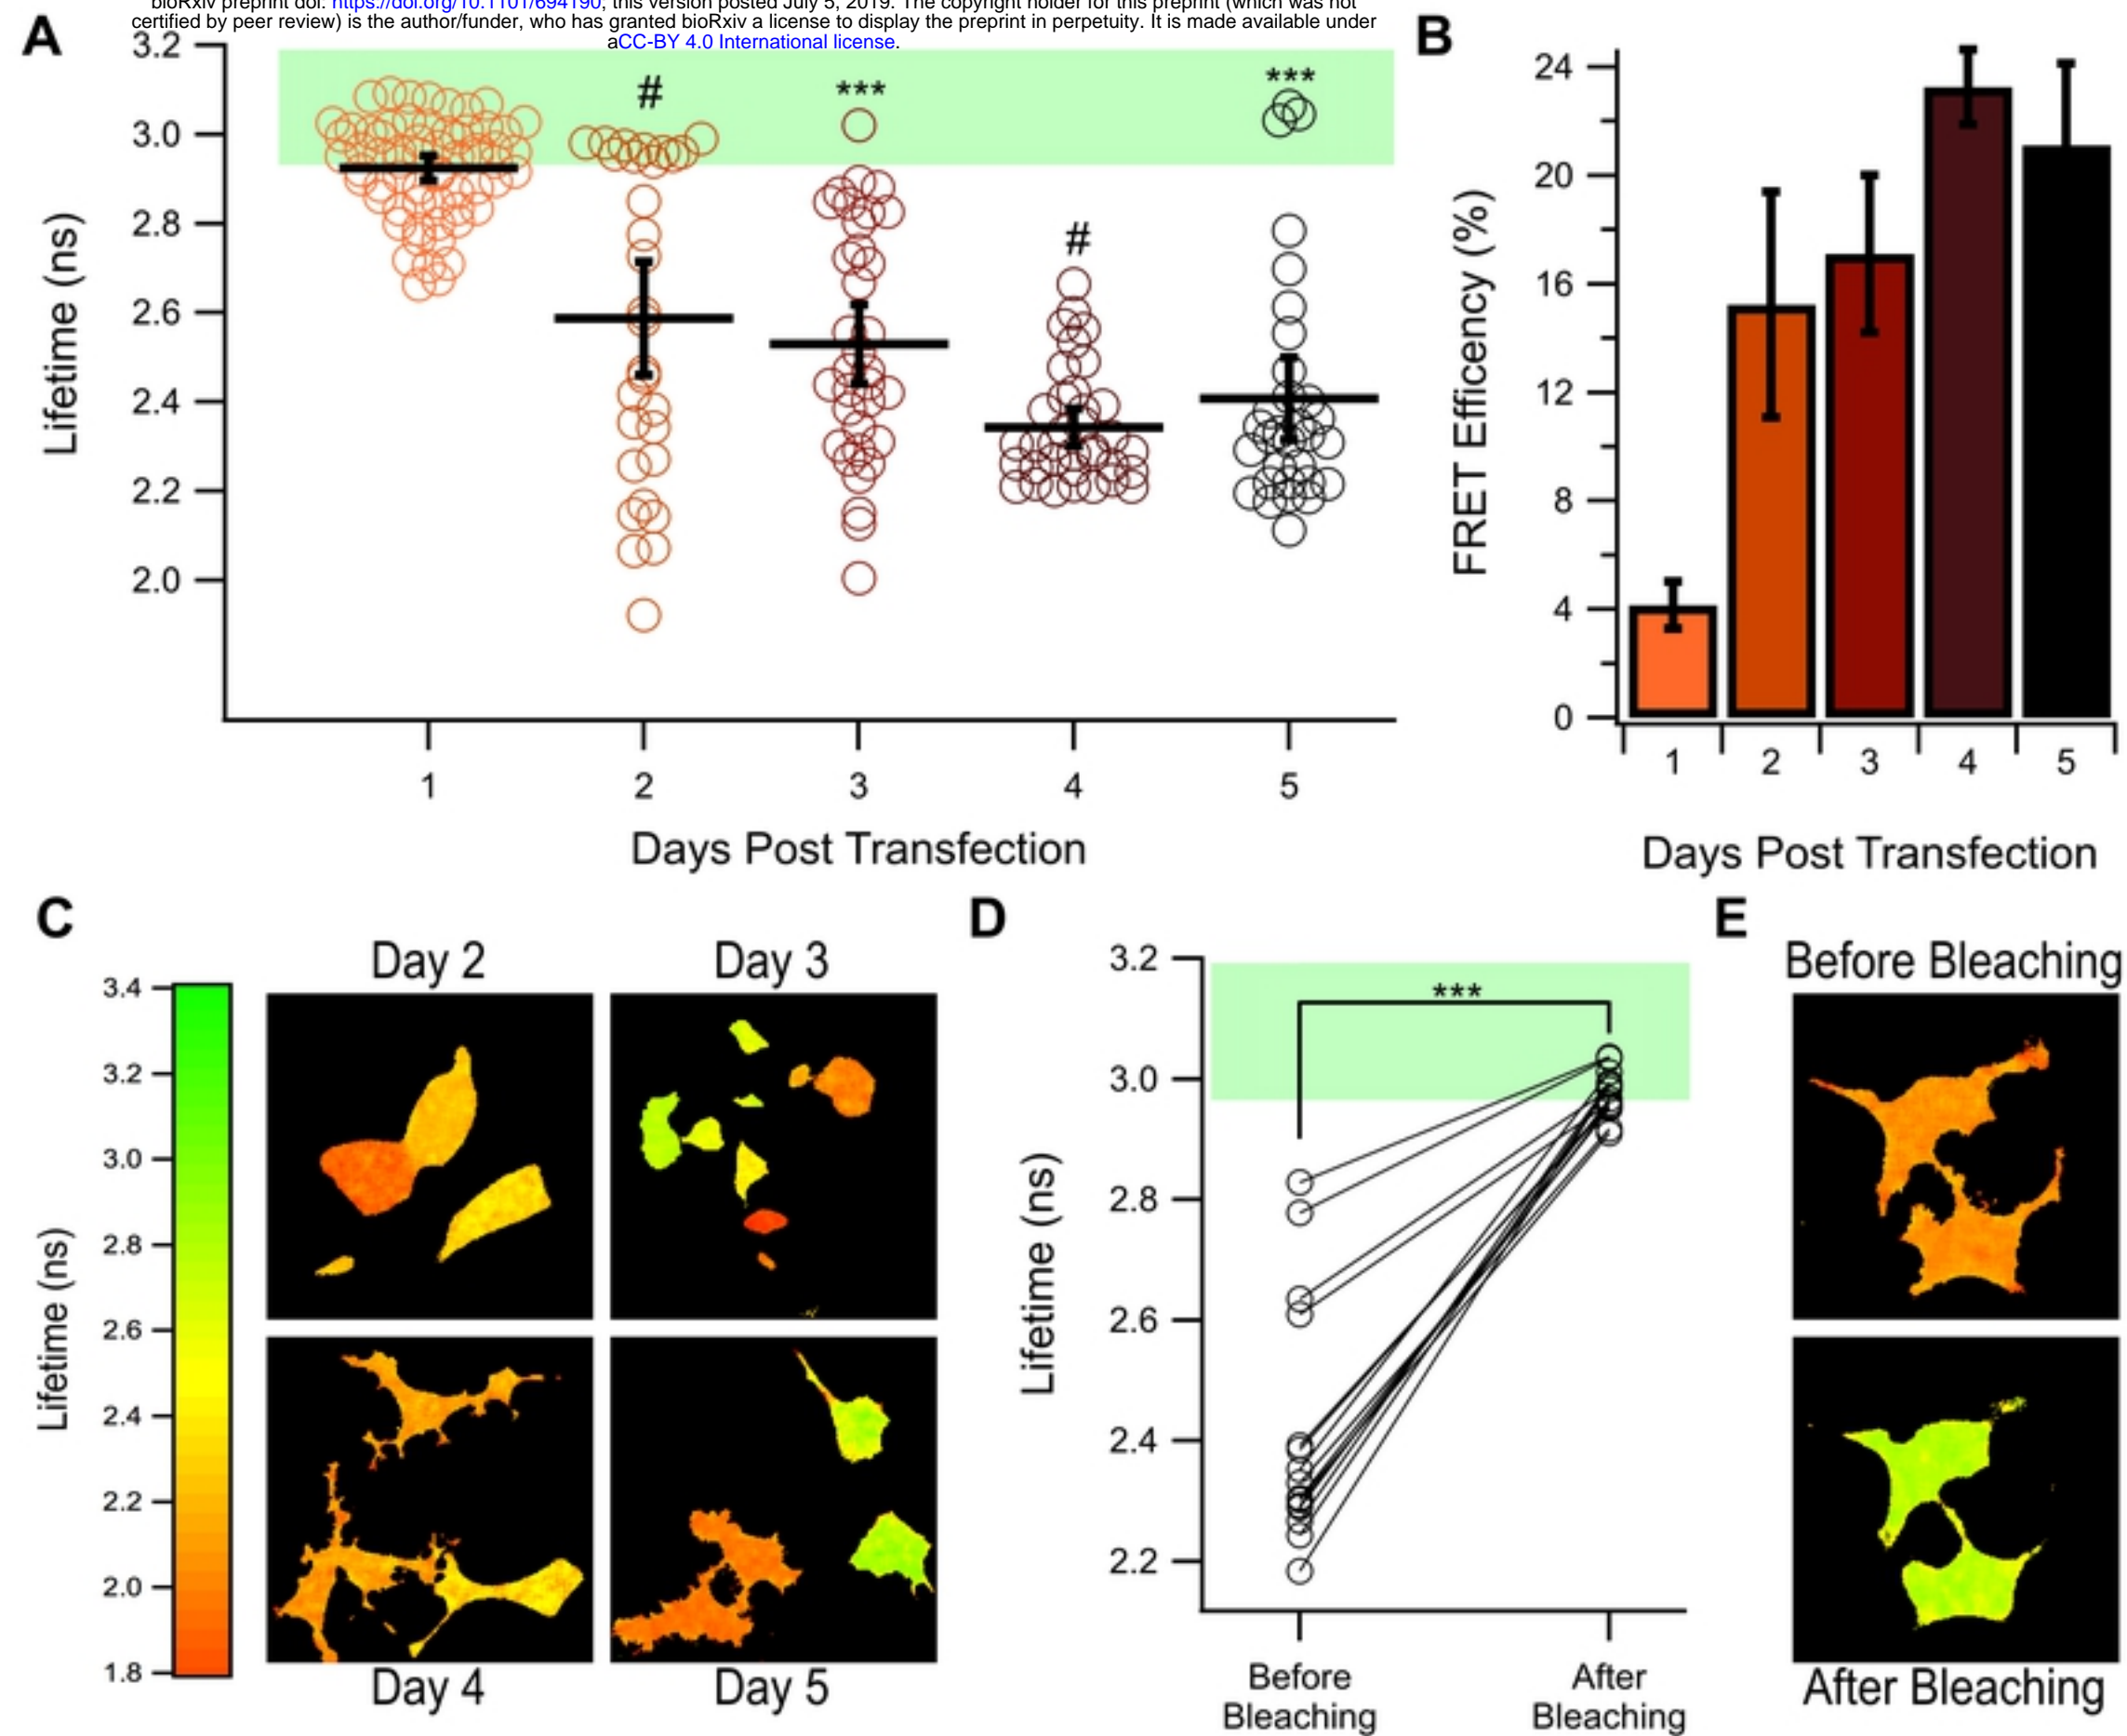

Figure 6
